32 <sup>15</sup>These authors contributed equally

33 <sup>16</sup>Lead Contact

34

35 \*Correspondence: [xuxun@genomics.cn](mailto:xuxun@genomics.cn) (X.X.), [huyong@genomics.cn](mailto:huyong@genomics.cn) (Y.H.),

36 [miguel@gibh.ac.cn](mailto:miguel@gibh.ac.cn) (M.A.E.), [liulongqi@genomics.cn](mailto:liulongqi@genomics.cn) (L.L.)

37

38 **Key words:**

39 Single-cell transcriptome, non-human primate, COVID-19, SARS-CoV-2, ACE2, TMPRSS2,

40 Interleukin 6, STAT transcription factors, immune cell exhaustion

41

42 **Bullet points:**

43 1-We used a single-cell transcriptome atlas of 9 monkey tissues to study COVID-19.

44 2-*ACE2*<sup>+</sup>*TMPRSS2*<sup>+</sup> epithelial cells of lung, kidney and liver are targets for SARS-CoV-2.

45 3-*ACE2* correlation analysis shows *IDO2* and *ANPEP* as potential therapeutic opportunities.

46 4-We unveil a link between IL6, STAT transcription factors and boosted SARS-CoV-2 entry.

47

48

49 **ABSTRACT**

50

51 Stopping COVID-19 is a priority worldwide. Understanding which cell types are targeted by  
52 SARS-CoV-2 virus, whether interspecies differences exist, and how variations in cell state  
53 influence viral entry is fundamental for accelerating therapeutic and preventative  
54 approaches. In this endeavor, we profiled the transcriptome at single-cell resolution of nine  
55 tissues from a *Macaca fascicularis* monkey. The distribution of SARS-CoV-2 facilitators, ACE2  
56 and TMRPSS2, in different cell subtypes showed substantial heterogeneity across lung,  
57 kidney, thyroid and liver. Co-expression analysis identified immunomodulatory proteins such  
58 as IDO2 and ANPEP as potential SARS-CoV-2 targets responsible for immune cell exhaustion.  
59 Furthermore, single-cell chromatin accessibility analysis of the kidney unveiled a plausible link  
60 between IL6-mediated innate immune responses aiming to protect tissue and enhanced ACE2  
61 expression that could promote viral entry. Our work constitutes a unique resource for  
62 understanding SARS-CoV-2 pathophysiology in two phylogenetically close species, which  
63 might guide in the development of effective treatments in humans.

64

## 65 INTRODUCTION

66

67 As the distance between humans and wild animal habitats diminishes due to uncontrolled  
68 human expansion, a series of zoonotic diseases with high mortality rates have emerged. For  
69 instance, the recent outbreak of Ebola in Africa, which killed over 5,000 people, was most  
70 likely spread from bats and primates to humans (Kock et al., 2019). The current outbreak of  
71 coronavirus disease 2019 (COVID-19) caused by the coronavirus severe acute respiratory  
72 syndrome coronavirus 2 (SARS-CoV-2) (Zhu et al., 2020) is not the only example of  
73 coronaviruses that have recently passed from animals to humans. Coronaviruses are a family  
74 of RNA viruses that typically cause respiratory tract infections in humans, yet they are  
75 frequently in the reservoir of wild animals with no disease (Cui et al., 2019). For example, the  
76 common cold is often (10-15%) caused by a coronavirus (e.g. HCoV-229E and HCoV-OC43) (Su  
77 et al., 2016). However, coronaviruses can also lead to severe and life-threatening diseases. In  
78 the early 2000s a coronavirus called SARS-CoV, believed to be passed from bats to humans in  
79 South East Asia, caused more than 700 deaths from around 8,000 confirmed cases worldwide  
80 (Lau et al., 2005). Since 2012, another zoonotic coronavirus which is believed to have passed  
81 from camels to humans in the Middle East was designated as Middle East Respiratory  
82 Syndrome (MERS) (Reusken et al., 2013). To date, there have been over 2,500 confirmed  
83 cases of MERS with over 800 deaths. While SARS appears to have been eradicated, MERS  
84 cases are sporadic and human to human spread is limited (Su et al., 2016).

85 As of 2<sup>nd</sup> April 2020, COVID-19 (Zhu et al., 2020) has become a global pandemic with more  
86 than 930,000 confirmed cases and over 47,000 deaths. Due to its high infectivity rate and the  
87 high level of intensive care that many patients need, COVID-19 has overwhelmed national  
88 health services and destabilized the world. One important reason is that many people who  
89 are positive for the virus show mild symptoms (Chan et al., 2020; Rothe et al., 2020), leading  
90 to unnoticed spread of the virus. The current worldwide emergency, possibility of expansion  
91 to less developed countries, risk of virus mutations and the perpetuation beyond this season  
92 has made it imperative to stop the current trajectory of virus spreading. Developing drugs and  
93 preventative vaccines are ongoing but to warrant success it is necessary to have more  
94 knowledge about the disease mechanisms. So far, little is known except for the viral binding  
95 via angiotensin converting enzyme 2 (ACE2) and subsequent priming by type 2  
96 transmembrane serine protease 2 (TMPRSS2) protease, which are shared mechanisms with



97 SARS and MERS (Hoffmann et al., 2020; Walls et al., 2020). To test experimental treatments,  
98 animal models close to humans are necessary due to sequence variation of ACE2 and changes  
99 in the proportions of cell subtypes in organs between species. For these reasons, it is essential  
100 to have a species close to human to study COVID-19. In this regard, monkey experiments have  
101 already shown that reinfection of SARS-CoV-2 is preventable by acquired immunity, thus,  
102 largely debunking one of the initial myths about the disease (Bao et al., 2020).

103 Questions about the proportions of cell types within organs between species and their  
104 crosstalk can be addressed effectively through single-cell profiling technologies, in particular  
105 single-cell RNA sequencing (RNA-seq) and single-cell assay for transposase accessible  
106 chromatin sequencing (ATAC-seq). Yet, although human data are accumulating (Han et al.,  
107 2020), monkey data are still scarce. The comparison between human and monkey data will  
108 be crucial for advancing our knowledge of COVID-19.

109 Here, we provide a high-resolution single-cell atlas of nine organs/tissues (lung, kidney,  
110 pancreas, brain, parotid, liver, thyroid, aorta artery, and blood) in monkey, encompassing  
111 215,334 cells. By comparing the expression of SARS related targets in monkey and human, we  
112 have identified cell-to-cell similarities as expected. Crucially, we also discovered stark  
113 differences in *ACE2* expression between these two species, for example in the ciliated vs  
114 alveolar type 2 cells of the lung and the hepatocytes in liver. We also observed that *ACE2* is  
115 heterogeneous among different epithelial cell subtypes across these organs/tissues,  
116 suggesting that variations in cell state could influence viral entry. Supporting this, single-cell  
117 ATAC-seq of monkey kidney identified regulatory elements driven by STAT transcription  
118 factors and interferon regulatory factor (IRF) in the *ACE2* locus. This suggests that cytokines,  
119 particularly IL6, aiming to induce a tissue protective response can exacerbate the disease by  
120 aiding viral entry into target cells. Additionally, through correlation analysis with *ACE2*  
121 expression, we have identified several potential candidates involved in COVID-19  
122 pathophysiology, such as Transmembrane protein 27 (TMEM27), Indoleamine 2,3-  
123 dioxygenase 2 (IDO2), DnaJ heat shock protein family (Hsp40) member C12 (DNAJC12) and  
124 Alanyl aminopeptidase N (ANPEP). These targets may offer therapeutic opportunities.

125 Taken together, our data constitute a unique resource which will aid the scientific community  
126 in the fight against SARS-CoV-2. From a wider perspective, this will also be useful for  
127 comparative studies aimed at understanding physiological differences between monkey and  
128 other species, in particular, human.

129 **RESULTS**

130

131 **Cellular heterogeneity of nine non-human primate tissues assessed by single-cell RNA-seq**

132 We profiled, at the single-cell level, the transcriptome of the model organism cynomolgus  
133 monkey (*Macaca fascicularis*), as it is phylogenetically close to human and this could help  
134 advance our knowledge of human physiology and disease. As proof of principle, we decided  
135 to use our data to understand how SARS-CoV-2 spreads and triggers the clinical features that  
136 have been lethal in a number of patients. For this study, we used a six-year-old female monkey  
137 in which we profiled nine different organs (indicated in **Fig. 1A**). These included lung, liver and  
138 kidney as the known affected organs by the closely related SARS-CoV infection (Hamming et  
139 al., 2004), and have been reported to have high *ACE2* expression in human (Naicker et al.,  
140 2020). Peripheral blood mononuclear cells (PBMC) were added because altered immune  
141 responses are thought to be detrimental in the disease (Conti et al., 2020). Neocortex was  
142 chosen because of the clinical symptoms which involve loss of smell and taste suggesting that  
143 the central nervous system may be targeted (Bagheri et al., 2020). The parotid gland was  
144 chosen on the basis that saliva is one of the main means of infection spread. Additionally, we  
145 selected aorta, thyroid and pancreas.

146 We employed a high-throughput platform recently developed in-house, DNBelab C4, which  
147 is a scalable and cost-effective approach for microfluidic droplet-based approach (Liu et al.,  
148 2019). Except for PBMC sequencing, which was performed using cells in suspension, the  
149 sequencing for all the other organs was done using single-nucleus library preparations.  
150 Following euthanasia, the selected organs were extracted, single-nucleus/cell suspensions  
151 were obtained and used for library preparation. A total of 40,226 liver, 45,286 kidney, 36,421  
152 pancreas, 44,355 parotid gland, 12,822 lung, 7,877 thyroid, 6,361 neocortex, 2,260 aorta and  
153 19,726 nuclei/PBMC passed quality control and were used for downstream analysis  
154 (**Supplemental table 1, Fig. S1A, B**).

155 In a global view of our single-cell dataset, each organ clustered separately, with the exception  
156 of a few cell types such as macrophages, adipocytes and endothelial cells, which were shared  
157 between different organs (**Fig. 1B**). We performed Uniform Manifold Approximation and  
158 Projection (UMAP) on the 215,334 cells and identified 44 major clusters by performing  
159 unbiased graph-based Louvain clustering (**Supplemental table 1**). Some clusters were largely  
160 composed of cells belonging to a specific tissue, such as hepatocytes in cluster 14, pancreas

161 acinar cells in cluster 27 and parotid acinar cells in cluster 31 (**Fig. 1C, S1C**). We next  
162 performed clustering and differential gene expression analysis to dissect the cellular  
163 composition of each individual organ. This analysis confirmed the typical patterns of cell  
164 heterogeneity for all the organs/tissues. When examining the lung tissue, we defined 10  
165 major clusters with specific molecular markers, including ciliated cells, macrophages,  
166 fibroblasts, pericytes, alveolar (pneumocytes) type 1 and type 2, endothelial and club cells  
167 (**Fig. S2A**). The kidney consisted of 11 clusters, those being podocytes, thick ascending limb  
168 cell, proximal tubule cells, intercalated cells 1 and 2, connecting tubule cells, distal convoluted  
169 tubule cells, stomal cells, thin limb cells, principal cells and endothelial cells (**Fig. S2B**). Analysis  
170 of liver tissue revealed hepatocytes to be the larger population of cells, while other clusters  
171 consisted of cholangiocytes, macrophages (Kupffer cells), natural killer-T (NK-T) cells,  
172 endothelial cells and hepatic stellate cells (**Fig. S2C**). In agreement with previous data,  
173 inspection of PBMC clustering revealed large populations of B cells, CD4<sup>+</sup>, CD8<sup>+</sup> naïve and CD8<sup>+</sup>  
174 memory T cells, together with smaller populations of natural killer (NK) cells, dendritic cells,  
175 CD16<sup>+</sup> and CD14<sup>+</sup> monocytes (**Fig. S2D**). We clustered the neocortex and found excitatory  
176 neurons, astrocytes, microglia, parvalbumin (PVAlb), somatostatin-expressing neurons (SST),  
177 synaptic vesicle glycoprotein-expressing cells (SV2C), vasoactive intestinal polypeptide-  
178 expressing neurons (VIP), oligodendrocytes and oligodendrocyte precursor cells (**Fig S2E**).  
179 Parotid gland instead was composed of a large cluster of serous acinar cells together with  
180 small clusters of macrophages, myoepithelial cells, striated duct cells, mucous acinar cells and  
181 intercalated duct cells (**Fig. S2F**). Aorta cells could be further divided into adipocytes,  
182 endothelial cells, myofibroblasts and a large proportion of smooth muscle cells (**Fig. S2G**). Our  
183 clustering also demonstrated that most of the thyroid gland is composed of follicular cells,  
184 with smaller populations of adipocytes, endothelial cells, stromal and smooth muscle cells  
185 (**Fig. S2H**). Finally, our data showed the largest population of the pancreas to be acinar cells,  
186 while smaller clusters were comprised of macrophages, ductal, alpha and beta cells (**Fig. S2I**).  
187 In conclusion, we have successfully profiled the transcriptome of nine organs at a single-cell  
188 resolution in monkey, which could assist in the study of COVID-19.

189

### 190 ***ACE2* and *TMPRSS2* single-cell expression landscape in a non-human primate**

191 Recent studies have reported that, similarly to SARS-CoV, the capacity of SARS-CoV-2 virus to  
192 infect host cells relies on viral spike (S) protein binding to ACE2 entry receptor (Hoffmann et

193 al., 2020; Walls et al., 2020), which is involved in the control of blood pressure through the  
194 renin-angiotensin system (Turner et al., 2004). This phenomenon is primed by the  
195 multifunction serine protease TMPRSS2 (Kim et al., 2006). Accordingly, double positive  
196 ( $ACE2^+/TMPRSS2^+$ ) cells have a higher risk of infection by SARS-CoV-2. Although  
197 immunohistological studies have demonstrated localization of these two proteins in the  
198 respiratory tract (Jia et al., 2005), it is unclear how many cell subtypes express these genes  
199 and how homogenous the expression among a specific cell subtype is. Also, comprehensive  
200 information about other cell types and organs that express these two proteins and could be  
201 targeted by the virus in human or monkey is lacking.

202 We inspected our data to see how widespread and homogenous *ACE2* expression was in the  
203 monkey tissues. As expected, *ACE2* was detected in several lung clusters, such as ciliated cells,  
204 club cells and pulmonary alveolar type 2 cells (**Fig. 2A, 3A upper panel**). In the kidney, *ACE2*  
205 was primarily present in proximal tubule cells, though interestingly, the expression was  
206 heterogenous (**Fig. 2A, 3B upper panel**). This is consistent with reports that a significant  
207 number of COVID-19 patients display altered kidney function (Li et al., 2020; Naicker et al.,  
208 2020). In the liver, *ACE2* was mostly expressed in cholangiocytes, with a smaller degree of  
209 expression also found in hepatocytes (**Fig. 2A, 3C upper panel**). Notably, the closely related  
210 SARS-CoV caused liver injury due to hepatitis in some patients (Peiris et al., 2003), suggesting  
211 that the liver may also be a direct target for SARS-CoV-2. Likewise, *ACE2* was detected in  
212 follicular cells within the thyroid tissue (**Fig. S3**). In contrast, little or no expression was  
213 observed in neocortex, pancreas, parotid and PBMC (**Fig. 2A, S3A**).

214 On the other hand, *TMPRSS2* displayed widespread expression across multiple tissues,  
215 although it was highest in kidney cells. However, in contrast to *ACE2*, its expression was  
216 highest in the distal convoluted tubule, thin limb, intercalated and principal cell 1 and 2 kidney  
217 clusters (**Fig. 2B, 3B lower panel, S3B**). Additionally, significant *TMPRSS2* was observed in  
218 both parotid and pancreatic acinar cells, follicular cells and in several lung clusters (**Fig. 2B**).  
219 We then determined which cells co-expressed both genes ( $ACE2^+/TMPRSS2^+$ ). The largest  
220 overlap was observed in the ciliated and club cell clusters of the lung and the proximal tubule  
221 cells of the kidney. A smaller overlap was observed in hepatocytes and pancreatic cells (**Fig.**  
222 **2C, 2E, 3A lower panel, 3C lower panel**).

223 Therefore, our data show that *ACE2* and *TMPRSS2* are expressed in a variety of cell types,  
224 mainly epithelial cells, within the nine monkey organs/tissues (**Supplemental table 2A**). They

225 also suggest that variations in cell state (e.g. differentiation state, stimulation state or  
226 topographical distribution) cause heterogenous expression across an individual tissue. These  
227 observations may provide important clues about COVID-19 pathogenesis and  
228 symptomatology.

229

### 230 **Comparative analysis of *ACE2* and *TMPRSS2* expression in human and non-human primate**

231 Given the heterogeneous nature of *ACE2* and *TMPRSS2* expression in monkey tissues, we  
232 decided to investigate similarities and differences between human and monkey. For this  
233 purpose, we retrieved publicly available data from single-cell studies in human (see methods).  
234 *TMPRSS2* distribution was similar in cell subtypes of lung, kidney and liver between human  
235 and monkey (**Fig. 3D-3F**). However, strikingly, *ACE2* showed distinct patterns among cell  
236 subtypes in all three organs between the two species (**Fig. 3D-3F**). The biggest differences  
237 were observed in ciliated cells of the lung, which had the highest expression of *ACE2* in  
238 monkey, and pulmonary alveolar type 2 cells, which had the highest expression of *ACE2* in  
239 human. The function of ciliated cells is to move substances (e.g. cell debris and toxic material)  
240 across the surface of the respiratory tract and are commonly targeted by respiratory viruses,  
241 whereas pulmonary alveolar type 2 cells have regenerative properties, are crucial for alveolar  
242 homeostasis and produce surfactant (Hamm et al., 1992; Mason and Williams, 1977). In the  
243 kidney of both monkey and human, the highest *ACE2* expression was in proximal tubule cells  
244 (**Fig. 3E**), which are responsible for electrolyte and nutrient reabsorption. However, renal  
245 endothelial cells had higher expression in monkey compared to human. In liver,  
246 cholangiocytes had similarly high *ACE2* expression in monkey and human, but hepatocytes  
247 showed higher expression and more positive cells in the human (**Fig. 3F**). After discovering  
248 heterogenous expression of *ACE2* within the proximal tubule cells, we revisited the previously  
249 analyzed data and were able to sub cluster this population of cells into two (S1 and S3) based  
250 on the expression of *SLC5A2* and *SLC7A13* (Lee et al., 2015) (**Supplemental table 2B, Fig. S4**).  
251 These two genes are sodium and glucose cotransporters involved in glucose reabsorption in  
252 the kidney (Santer and Calado, 2010; Yu et al., 2011). We did not include thyroid, pancreas or  
253 aorta in these analyses because of lack of high-quality available human single-cell datasets.  
254 As for the neocortex and PBMC, they have little to no expression of *ACE2* in human (data not  
255 shown).

256 These differences in *ACE2* expression across cell subtypes in the lung, kidney and liver in  
257 monkey and human raise the possibility that infection with SARS-CoV-2 in the two species will  
258 have different effects.

259

### 260 ***ACE2* correlation analysis across cell types reveals potentially therapeutic targets**

261 To shed light on potential mechanisms that could facilitate *ACE2*-mediated SARS-CoV-2  
262 infection, we performed an analysis of the Pearson's correlation coefficient, based on gene  
263 expression in the 44 cell subtypes, to determine what genes are co-regulated with *ACE2* in  
264 monkey tissues. Correlated genes were considered as those displaying a coefficient higher  
265 than 0.6 with an adjusted p-value < 0.001. Using these criteria, we observed several genes  
266 with marked correlation, including genes that belong to metabolic and developmental  
267 pathways and genes involved in the cellular response to xenobiotic stimuli (**Fig. 4A, B**). The  
268 highest correlation was observed for transmembrane protein 27 (*TMEM27*, cor = 0.84), a  
269 protein involved in trafficking amino acid transporters to the apical brush border of kidney  
270 proximal tubules (Chu et al., 2017). This is unsurprising considering that *TMEM27* is an  
271 important paralog of *ACE2*, and high expression was restricted to kidney cells. DnaJ heat shock  
272 protein family (Hsp40) member C12 (*DNAJC12*, cor = 0.78), a gene with a role in immune  
273 response processes (Sigdel et al., 2013), had a distribution like *TMEM27*. Importantly, we also  
274 observed high correlation with Indoleamine 2,3-dioxygenase 2 (*IDO2*, cor = 0.77), a gene with  
275 abundant expression in kidney and liver cells that was also expressed in the lung and other  
276 organs. *IDO2* has been shown to function during the early phases of immune responses and  
277 to mediate inflammatory autoimmunity (Ball et al., 2009; Lepiller et al., 2015). *ANPEP*, which  
278 encodes for alanyl aminopeptidase N, was also co-expressed with *ACE2* in kidney, liver and to  
279 a lesser extent in lung too (cor = 0.64), like *IDO2* (**Fig. 4C, D**). Interestingly, *ANPEP* has also  
280 been shown to be participate in immune responses, virus receptor activity and in mediating  
281 virus entry into host cells (Delmas et al., 1992; Wentworth and Holmes, 2001).

282 These data highlight potential therapeutic targets to help in the fight against SARS-CoV-2. Due  
283 to their potential co-regulation with *ACE2*, *DNAJC12* and *ANPEP* it is possible that they  
284 modulate, or are directly involved in viral entry. Alternatively, depletion of cells expressing  
285 *IDO2* and *ANPEP*, through a cytopathic effect of the virus, could trigger an uncontrolled  
286 immune response and contribute to the immune cell exhaustion observed in COVID-19 (Guo  
287 et al., 2020).



## 288 **Epigenetic regulation of *ACE2* in each cell subtype of the monkey kidney**

289 To understand whether epigenetic mechanisms underlie the heterogeneity of cellular  
290 composition and cell state variation in the kidney, we employed DNBelab C4 technology to  
291 perform high-throughput single-cell ATAC-seq (**Fig. 5A**). After filtering, 6,353 nuclei were used  
292 for downstream analysis (**Supplemental table 4, Fig. S5A, B**). We integrated these data with  
293 the kidney transcriptomic data described in **Fig. 1** and proceeded to perform Louvain  
294 clustering to map all the different cell types within the dataset (**Fig. 5B**). Consistent with the  
295 transcriptomic data, our epigenomic mapping identified thick ascending limb cells and  
296 proximal tubule cells as the largest kidney clusters (**Fig. S2B**). Similarly, smaller clusters of  
297 podocytes, principal, intercalated, connected tubule, distal convoluted tubule, thin limb,  
298 endothelial and stromal cells were detected (**Fig. 5C, S5C**). Analysis of open chromatin regions  
299 revealed discrete peaks in the *ACE2* locus, with the highest signal detected in proximal tubule  
300 cells S1 and S3, which are also the highest *ACE2*-expressing cells (**Fig. 5D**). Our approach failed  
301 to detect significant signal enrichment in the *ACE2* locus in endothelial cells, possibly related  
302 to the low level of expression (**Fig. 5D**). Within the cells of the kidney we observed the highest  
303 percentage of *ACE2*<sup>+</sup> cells in the proximal tubule S3, with a lower percentage in the proximal  
304 tubule S1 and endothelial cells (**Fig. 5E**). Motif analysis within the open chromatin regions in  
305 *ACE2*<sup>+</sup> cells demonstrated that these regions were preferentially enriched in signal transducer  
306 and activator of transcription 1 and 3 (STAT1 and 3) and interferon regulatory factor 1 (IRF1)  
307 binding sites (**Fig. 5F**). These findings suggested that tissue protective cytokines including IL5,  
308 IL6, EGF and interferons are acting on these proximal tubule cells S3 to induce *ACE2*. We  
309 focused on IL6 because a recent clinical trial has been started that uses anti-IL6 receptor (IL6R)  
310 antibodies in the treatment of COVID-19  
311 (<http://www.chictr.org.cn/showprojen.aspx?proj=49409>). IL6 is a potent regulator of  
312 immune responses and can be produced by a variety of interstitial cells including fibroblasts,  
313 endothelial cells and more importantly tissue macrophages (Heinrich et al., 1990).  
314 Interestingly, we also noticed that distribution of *IL6R* correlated well with *ACE2* in proximal  
315 tubule cells (**Fig. 5G, Supplemental Fig. S5D**). In human kidney a similar co-expression pattern  
316 was detected (**Fig. 5H**).

317 Our observations suggest a potential positive feedback loop between IL6 and *ACE2* expression  
318 that can exacerbate COVID-19 disease progression due to increased viral entry and  
319 dissemination.

## 320 DISCUSSION

321

322 Mammalian tissues and organs are composed of many different cell types that can vary in  
323 abundance and cell state. Tissue heterogeneity is only beginning to be unraveled thanks to  
324 the advent of single-cell profiling technologies that allow us to precisely map transcriptomic  
325 and epigenomic programs. These technologies are revolutionizing our view of human  
326 physiology and disease. Great efforts are being made to generate the first version of both  
327 human and murine atlases (Han et al., 2018; Han et al., 2020); the mouse is among the most  
328 commonly used model organisms in biomedical research, but many developmental or  
329 pathological aspects are not paralleled in human. Understanding tissue and organ complexity  
330 in species that are phylogenetically close to humans is an unmet requirement.

331 In this study, we have generated a single-cell transcriptomic atlas of nine organs (liver, kidney,  
332 lung, pancreas, neocortex, aorta, parotid gland, thyroid and peripheral blood) from  
333 cynomolgus monkey. We used this dataset not only to provide fundamental information  
334 about the cellular composition of the different tissues tested but also as a platform to dissect  
335 the overall expression distribution of the SARS-CoV-2 entry receptor, ACE2, and its serine  
336 protease coactivator TMPRSS2 (Hoffmann et al., 2020; Walls et al., 2020). Interestingly, ACE2  
337 was expressed in multiple epithelial tissues besides the lung, specifically the kidney, liver and  
338 thyroid. Other organs of epithelial origin such as the gut have also been implicated in the  
339 pathogenesis of the disease (Ong et al., 2020). A consequence of this is that the SARS2-CoV-  
340 2 virus could infect these organs too, which would explain some of the reported clinical  
341 manifestations of COVID-19 (Zhu et al., 2020). By comparing our dataset with publicly  
342 available human single-cell RNA-seq data, we have also uncovered significant differences  
343 between human and monkey. We showed different expression patterns for *ACE2* in the lung,  
344 where the highest levels were detected in ciliated cells in monkey and pulmonary alveolar  
345 type 2 cells in human. Similarly, we observed marked differences in liver, in which monkey  
346 hepatocytes displayed higher *ACE2* and a larger number of positive cells compared to the  
347 human. We do not know whether these differences will affect the pathogenesis of COVID-19  
348 between these two species. Nevertheless, this is a relevant finding considering that monkeys  
349 are a preferred model for studying the effectiveness of drug treatments and of vaccines  
350 against the impending COVID-19 pandemic.



351 Through correlation analysis, we identified new potential mechanisms that could facilitate  
352 ACE2-mediated viral infection, including genes previously unreported in the context of SARS-  
353 CoV-2 that are involved in stimulating different types of immune responses. We observed  
354 high expression of *IDO2* and *ANPEP* in kidney, liver and lung. Expression of these can be  
355 further induced by viral infection and have been reported to be immune modulators and/or  
356 mediate viral entry (Ball et al., 2009; Delmas et al., 1992). These observations are relevant as  
357 they highlight new potential therapeutic vulnerabilities in the current emergency. In this  
358 respect, a number of inhibitors of ANPEP are currently being developed and could serve to  
359 prevent the immune cell exhaustion often observed in many severe COVID-19 cases (Zheng  
360 et al., 2020). Similarly, mesenchymal stem/stroma cells (MSC) have immunomodulatory  
361 functions that are partly related to IDO2 production (Ball et al., 2009). It is tempting to  
362 speculate that cell therapies based on MSC could ameliorate COVID-19 by normalizing  
363 immune function and preventing cytokine storms (Wilson et al., 2015).

364 Intriguingly, in our data, we see heterogenous expression of *ACE2* within the individual cell  
365 subtypes in six out of the nine monkey organs that we analyzed, which is also observed in the  
366 three human organs analyzed. Interestingly, we noticed two different cell populations in the  
367 kidney proximal tubule, one with higher *ACE2* expression than the other. We performed  
368 single-cell ATAC-seq of this organ to understand whether this phenomenon has an epigenetic  
369 basis. Analysis of open chromatin regions within the *ACE2* locus revealed the enrichment of  
370 STAT1, STAT3 and IRF1 binding sites. These transcription factors have important immune  
371 functions and are direct targets of tissue protective and innate immune responses such as  
372 interleukin-6 signaling pathway and interferons. Analysis of IL6R distribution showed broad  
373 expression within different the *ACE2*<sup>+</sup> organs in monkey and human. This suggests a link  
374 between paracrine IL6 (e.g. secreted by stromal cells including tissue resident macrophages)  
375 and enhanced *ACE2* expression across different organs. Higher and more widespread *ACE2*  
376 expression could promote increased viral entry. This observation could be of the utmost  
377 importance given recent reports describing clinical trials with Tocilizumab, a monoclonal  
378 antibody used for IL6R blockade in patients with rheumatoid arthritis (Villiger et al., 2016), for  
379 the treatment of COVID-19 (<http://www.chictr.org.cn/showprojen.aspx?proj=49409>). IL6 has  
380 been related to aging and tissue damage (Mosteiro et al., 2018), and this may explain why  
381 elderly individuals and those with underlying inflammatory conditions have more severe  
382 reactions to SARS-CoV-2 infection (**Fig. 6**). Importantly, high IL6 levels have been detected in

383 plasma from COVID-19 patients (Wan et al., 2020). The proposed enhanced affinity of SARS-  
384 CoV-2 for ACE2 compared to SARS-CoV may underlie the differences in the clinical course  
385 between the two diseases (Shang et al., 2020).

386 All these observations revealed new potential mechanisms for COVID-19, opening new  
387 therapeutic avenues for disease management. However, caution should be exercised when  
388 making decisions before additional experimental validation becomes available.

389

## 390 **METHODS**

391

### 392 **Ethics statement**

393 This study was approved by the Institutional Review Board on Ethics Committee of BGI  
394 (permit no. BGI-IRB19125).

395

### 396 **Collection of monkey tissues**

397 A 6-year old female cynomolgus monkey was purchased from Huazhen Laboratory Animal  
398 Breeding Centre (Guangzhou, China). The monkey was anesthetized with ketamine  
399 hydrochloride (10 mg/kg) and barbiturate (40 mg/kg) administration before being euthanized  
400 by exsanguination. Tissues were isolated and placed on the ice-cold board for dissection.  
401 Whole organs including lung, kidney, pancreas, liver, brain, thyroid, parotid gland, and aorta  
402 were cut into 5-10 pieces, respectively (50-200 mg/piece). Samples were then quickly frozen  
403 in liquid nitrogen and stored until nuclear extraction was performed. PBMC were isolated  
404 from heparinized venous blood using a Lymphoprep<sup>TM</sup> medium (STEMCELL Technologies,  
405 #07851) according to standard density gradient centrifugation methods. PBMC were  
406 resuspended in 90% FBS, 10% DMSO (Sigma Aldrich, #D2650) freezing media and frozen using  
407 a Nalgene<sup>®</sup> Mr. Frosty<sup>®</sup> Cryo 1°C Freezing Container (Thermo Fisher Scientific, #5100-0001)  
408 in a -80°C freezer for 24 hours before being transferred to liquid nitrogen for long-term  
409 storage.

410

### 411 **Single-nucleus/cell suspension preparation**

412 We isolated nuclei as previously described (Bakken et al., 2018). Briefly, tissues were thawed,  
413 minced and added to lysis buffer. Lysates were filtered and resuspended in cell resuspension  
414 buffer. Frozen PBMC vials were rapidly thawed in a 37°C water bath for ~2 minutes, then  
415 quenched with 10 ml 37°C pre-warmed 1X phosphate-buffered saline (PBS, Thermo  
416 Fisher Scientific, #10010031) supplemented with 10% FBS. PBMCs were centrifuged at 500  
417 *R.C.F.* for 5 minutes at room temperature. The supernatant was removed, and the cell  
418 pellet was resuspended in 3 ml 37°C pre-warmed 1X PBS containing 0.04% bovine serum  
419 albumin (BSA, Sangon Biotech, A600903), passed through a 40 µm cell strainer (Falcon,  
420 #352340) and then centrifuged at 500 *R.C.F.* for 5 minutes at room temperature. Nuclei or

421 cells were resuspended with cell resuspension buffer at a concentration of 1,000 cells/ $\mu$ l for  
422 single-cell library preparation.

423

#### 424 **Single-nucleus/cell sequencing**

425 The DNBelab C Series Single-Cell Library Prep Set (MGI, #1000021082) was utilized as  
426 previously described (Liu et al. 2019). In brief, single-nucleus/cell suspensions were used for  
427 droplet generation, emulsion breakage, beads collection, reverse transcription, and cDNA  
428 amplification to generate barcoded libraries. Indexed single-cell RNA-seq libraries were  
429 constructed according to the manufacturer's protocol. The sequencing libraries were  
430 quantified by Qubit™ ssDNA Assay Kit (Thermo Fisher Scientific, #Q10212). Single-cell ATAC-  
431 seq libraries were prepared using DNBelab C4 Single-Cell ATAC-seq Library Prep Set (MGI).  
432 DNA nanoballs (DNBs) were loaded into the patterned Nano arrays and sequenced on the  
433 ultra-high-throughput DIPSEQ T1 sequencer using the following read length: 30 bp for read 1,  
434 inclusive of 10 bp cell barcode 1, 10 bp cell barcode 2 and 10 bp unique molecular identifier  
435 (UMI), 100 bp of transcript sequence for read 2, and 10 bp for sample index.

436

#### 437 **Single-cell RNA-seq data processing**

438 Raw sequencing reads from DIPSEQ-T1 were filtered and demultiplexed using PISA (version  
439 0.2) (<https://github.com/shiquan/PISA>). Reads were aligned to *Macaca fascicularis*\_5.0  
440 genome using STAR (version 2.7.4a) (Dobin et al., 2013) and sorted by sambamba (version  
441 0.7.0) (Tarasov et al., 2015). Cell versus gene UMI count matrix was generated with PISA.

442

#### 443 **Cell clustering and identification of cell types**

444 Clustering analysis of the complete cynomolgus monkey tissue dataset was performed using  
445 Scanpy (version 1.4) (Wolf et al., 2018) in a Python environment. Parameters used in each  
446 function were manually curated to portray the optimal clustering of cells. In preprocessing,  
447 cells or nuclei were filtered based on the criteria of expressing a minimum of 200 genes and  
448 a gene which is expressed by a minimum of 3 cells or nuclei. Filtered data were  $\ln(\text{counts per}$   
449  $\text{million (CPM)/100} + 1)$  transformed. 3000 highly variable genes were selected according to  
450 their average expression and dispersion. The number of UMI and the percentage of  
451 mitochondrial gene content were regressed out and each gene was scaled by default options.  
452 Dimension reduction starts with principal component analysis (PCA), and the number of

453 principal components used for UMAP depends on the importance of embeddings. The  
454 Louvain method is then used to detect subgroups of cells. Distinguishing differential genes  
455 among clusters were ranked (Benjamini-Hochberg, Wilcoxon rank-sum test). Cell types were  
456 manually and iteratively assigned based on overlap of literature, curated and statistically  
457 ranked genes.

458 Each tissue dataset was portrayed using the Seurat package (version 3.1.1) (Stuart et al., 2019)  
459 in R environment by default parameters for filtering, data normalization, dimensionality  
460 reduction, clustering, and gene differential expression analysis. Finally, we annotated each  
461 cell type by extensive literature reading and searching for the specific gene expression  
462 pattern.

463

#### 464 **Gene correlation and Gene Ontology (GO) term enrichment analysis**

465 The correlation between *ACE2* and other genes was drawn using Pearson correlation  
466 coefficient (PCC) with gene expression value merged from cells of the same cell types with  
467 the R package psych (version 1.9.12.31). To infer the biological function of highly correlated  
468 genes ( $cor > 0.6$  and adjusted P value  $< 0.001$ ), we performed gene set enrichment analysis  
469 using Metascape (<https://metascape.org/gp/index.html>).

470

#### 471 **Differential gene expression analysis**

472 Differential expression analysis between proximal tubule S1 and proximal tubule S3 was  
473 performed using the FindMarkers function of the Seurat package (version 3.1.1).

474

#### 475 **Single-cell ATAC-seq data processing**

476 Raw sequencing reads from DIPSEQ-T1 were filtered and demultiplexed using PISA (version  
477 0.2) (<https://github.com/shiquan/PISA>). Peak calling was performed using MACS2 (version  
478 2.1.2) (Feng et al., 2012) with options -f BAM -B -q 0.01 -nomodel. The cell versus peak reads  
479 count matrix was generated by custom script. To create a gene activity matrix, we extracted  
480 gene coordinates for cynomolgus monkey from NCBI, and extended them to  $\pm 2$  kb region  
481 around TSS. The gene activity score matrix was calculated by custom script.

482

#### 483 **Single-cell ATAC-seq cell clustering and cell type identification**

484 Cells with low fragments (<1000) and TSS proportion (<0.1) were removed. Then, filtered data  
485 were imported into R and the dimensionality was reduced by latent semantic indexing.  
486 Anchors between single-cell ATAC-seq and single-cell RNA-seq datasets were identified and  
487 used to transfer cell type labels identified from the single-cell RNA-seq data. We embedded  
488 the single-cell ATAC-seq and single-cell RNA-seq cells by the TransferData function of Seurat  
489 (version 3.1.1).

490

#### 491 **Transcription factor motif enrichment analysis**

492 To predict the motif footprint in peaks within the *ACE2* promoter, we extracted genome  
493 sequences in the peak region with Seqkit (version 0.7.0) (Shen et al., 2016). The sequences  
494 were imported into R and were matched with all *Homo sapiens* motifs from JASPAR2018 using  
495 matchMotifs function in motifmatchr packages version 1.8.0 with default parameter.

496

#### 497 **Human single-cell RNA-seq datasets**

498 All human single-cell RNA-seq data matrix were obtained from publicly available dataset as  
499 described: (1) Kidney data from Stewart et al. was download from  
500 <https://www.kidneycellatlas.org/> (Stewart et al., 2019); (2) Lung data from Madisson et al.  
501 was download from <https://www.tissuestabilitycellatlas.org/> (Madisson et al., 2019); (3)  
502 Liver data from Aizarani et al. was download from GEO at accession GSE124395 (Aizarani et  
503 al., 2019).

504

#### 505 **Code availability**

506 Computer code used for processing the single-cell RNA-seq and single-cell ATAC-seq will be  
507 available upon request.

508

#### 509 **Data availability**

510 All raw data have been deposited to CNGB Nucleotide Sequence Archive and the accession  
511 number will be available upon request.

512

#### 513 **Acknowledgements**

514 We thank all members of the single-cell omics lab (BGI) and Esteban lab (GIBH) for their  
515 support. This work was supported by National Natural Science Foundation of China

516 (31900466, 31900582), Research and Development Program of China (2018YFA0106903), the  
517 Strategic Priority Research Program of the Chinese Academy of Sciences (XDA16030502) and  
518 CAS-JSPS Joint Research Projects (GJHZ2093), Natural Science Foundation of Guangdong  
519 Province, China (2018A030313379), the Shenzhen National Key Laboratory of Single-Cell  
520 Omics (ZDSYS20190902093613831) and Shenzhen Bay Laboratory (SZBL2019062801012).  
521 G.V. is supported by Chinese Academy of Sciences President's International Fellowship for  
522 Foreign Experts (2020FSB0002). C.W. is supported by Chinese Academy of Sciences  
523 President's International Fellowship Initiative for Postdoctoral Researchers (2019PB0177)  
524 and Research Fund for International Young Scientists grant (31950410553).

525

#### 526 **Author contributions**

527 L.L., M.A.E., Y.H. and X.X. conceived the idea. L.L., L.H., Y.L., S.L., X.W. and Y.Yuan. designed  
528 the experiment. L.H., Y.L., S.L., X.W., Y.Y., M.C. and C.W.W. collected the tissue samples. C.L.,  
529 Z.W., Y.Yuan, Y. Yu, M.W., T.W., Y.L., C.W., Y.Z., T.T., Y.H., H.L., L.X., J.X. and M.C. performed  
530 the experiments. X.W., T.P., Q.S., L.W., Z.Z., Y.L., S.Z. and S.L. performed the data analysis.  
531 L.L., L.H., X.W., C.L., G.V., T.P., C.W. and Y.L. prepared the figures. P.H.M provided critical  
532 review of the manuscript. M.A.E., G.V., C.W., Y.L. and L.L. wrote the manuscript with input  
533 from all authors. X.X., Y.H., L.L. and M.A.E supervised the entire study. All other authors  
534 contributed to the work. All authors read and approved the manuscript for submission.

535

#### 536 **Competing interests**

537 Employees of BGI have stock holdings in BGI.

538

539 **FIGURE LEGENDS**

540

541 **Figure 1. Construction of single-cell atlas across nine tissues of a *Macaca fascicularis***  
542 **monkey**

543 (A) Schematic representation of selected monkey tissues used in this study and description  
544 of experimental pipeline for the single-cell sequencing.

545 (B) UMAP visualization of all single cells from the dataset colored by tissue/organ (left) and  
546 number of cells from each tissue passing quality control (right).

547 (C) UMAP visualization of each cell type colored according to 44 clusters in the first round of  
548 clustering. Cell type annotation is provided in the figure and is associated with a number  
549 indicative of every cluster. n = 215,334 individual nuclei/cells.

550

551 **Figure 2. *ACE2* and *TMPRSS2* expression across 44 cell clusters in monkey**

552 (A-B) UMAP projection of *ACE2* (A) and *TMPRSS2* (B) expression in all single cells within our  
553 dataset.

554 (C) UMAP projection of *ACE2*<sup>+</sup>/*TMPRSS2*<sup>+</sup> cells.

555 (D) Barplot indicating the percentage of *ACE2* and *TMPRSS2* expressing cells within each cell  
556 cluster.

557 (E) Bubble plots showing the level of expression of *TMPRSS2* and *ACE2* genes and the ratio of  
558 expressing cells in the indicated cell types. The color of each bubble represents the level of  
559 expression and the size indicates the proportion of expressing cells.

560

561 **Figure 3. Comparative analysis of *ACE2* and *TMPRSS2* expression between monkey and**  
562 **human**

563 (A-C) UMAP projection of *ACE2* (top) and *TMPRSS2* (bottom) expression in single cells of  
564 monkey lung (A), kidney (B) and liver tissues (C). The red arrow in this panel indicates  
565 cholangiocytes. The color of the cells reflects the expression level as indicated in the scale  
566 bar. (D-F) Bubble plots showing the ratio and expression of *ACE2* and *TMPRSS2* in the  
567 indicated cell types of lung (D), kidney (E) and liver (F) in monkey and human. The color of  
568 each bubble represents the level of expression and the size indicates the proportion of  
569 expressing cells.

570



571 **Figure 4. Co-expression analysis of ACE2**

572 (A) Volcano plot of correlation coefficients (Pearson  $r^2$ ) from association tests between ACE2  
573 and other individual genes. The correlation coefficient for every gene (x-axis) versus the  
574 adjusted  $P$ -value (using Benjamini-Hochberg correction; y-axis). The genes indicated in the  
575 plot are those with a correlation score  $> 0.6$  and an adjusted  $P$ -value  $< 0.001$ .

576 (B) Gene ontology analysis of genes that show high expression correlation with ACE2.

577 (C) Scatter plots showing the association between ACE2 and the indicated genes. The  
578 correlation coefficients (Pearson  $r^2$ ) and adjusted  $P$ -values are shown in the plots.

579 (D) UMAP projection of expression of the indicated genes in all single cells.

580

581 **Figure 5. Chromatin accessibility analysis reveals epigenetic regulation of ACE2 in kidney**

582 (A) Schematic of experimental design for single-cell ATAC-seq of monkey.

583 (B) Joint UMAP visualization of kidney single-cell ATAC-seq data with single-cell RNA-seq data.

584 (C) UMAP visualization of single-cell ATAC-seq data.

585 (D) IGV visualization of aggregate single-cell ATAC-seq signal in each cell type.

586 (E) Ratio of ACE<sup>+</sup> cells in each cell type of kidney.

587 (F) The transcription factor motifs predicted based on DNA sequence within those regions of  
588 the ACE2 locus.

589 (G-H) UMAP projection of IL6R expression and cells with IL6R<sup>+</sup>/ACE2<sup>+</sup> cells in all kidney single  
590 cell in monkey (G) and human (H).

591

592 **Figure 6. Proposed molecular mechanism for SARS-Cov-2 pathogenesis through reinforced**  
593 **IL6-mediated immune response in monkey and humans.**

594 Schematic representation of potential mechanism of SARS-CoV-2 spreading through lung,  
595 kidney and liver. Kidney proximal tubule cells within the nephron have the highest expression  
596 of ACE2 receptor which facilitates virus entry. After virus contact, IL6R stimulates an immune  
597 response that, through the activation of STATs factors, potentiates the paracrine positive  
598 feedback loop that facilitates virus spreading. IL6 expression, which is higher in elderly  
599 patients and those with inflammatory conditions, is effectively targeted by anti-IL6R  
600 monoclonal antibodies leading to a more favourable disease course.

601

602

603 **SUPPLEMENTAL FIGURE LEGENDS**

604

605 **Supplemental Figure 1. Quality control of the single-cell RNA-seq libraries**

606 (A) Violin plot showing the number of unique molecular identifiers (UMIs) identified in each  
607 tissue.

608 (B) Violin plot showing the number of genes identified in each organ. (C) Heatmap showing  
609 the expression of marker genes of the indicated cell type

610

611 **Supplemental Figure 2. Various cell types identified in each tissue**

612 (A-I) UMAP visualization of cell clusters in lung (A), kidney (B), liver (C), PBMC (D), neocortex  
613 (E), parotid (F), aorta (G), thyroid (H) and pancreas (I). The name of the population  
614 corresponding to each cell cluster is indicated in every plot.

615

616 **Supplemental Figure 3. *ACE2* and *TMPRSS2* expression in each tissue**

617 (A-B) UMAP Projection of *ACE2* (A) and *TMPRSS2* (B) expression in each tissue.

618

619 **Supplemental Figure 4. Specific accessible chromatin in each cluster of kidney**

620 (A) UMAP visualization of single cells from the kidney tissue, colored by cell types.

621 (B) Volcano plot showing the differentially expressed genes between proximal tubule S1 and  
622 proximal tubule S3 cells. Examples of highly variable genes are indicated.

623 (C) UMAP projection of expression for the indicated genes in all single cells.

624 (D) The structure and specific gene expression in kidney tubules. The specific genes and *ACE2*  
625 expression level for proximal tubule S1 and proximal tubule S3 cells are indicated.

626

627 **Supplemental Figure 5. Accessible chromatin analysis in each cluster of kidney**

628 (A) Number of fragments captured in all cells of the two single-cell ATAC-seq libraries.

629 (B) Proportion of TSS fragments in all cells of the two single-cell ATAC-seq libraries.

630 (C) IGV visualization of specific accessible chromatin in each cell type.

631 (D) UMAP projection of *ACE2* expression in human kidney.

632

633

634 **REFERENCES**

635

636 Aizarani, N., Saviano, A., Sagar, Mailly, L., Durand, S., Herman, J.S., Pessaux, P., Baumert, T.F.,  
637 and Grun, D. (2019). A human liver cell atlas reveals heterogeneity and epithelial progenitors.  
638 *Nature* 572, 199-204.

639 Bakken, T.E., Hodge, R.D., Miller, J.A., Yao, Z., Nguyen, T.N., Aevermann, B., Barkan, E.,  
640 Bertagnolli, D., Casper, T., Dee, N., *et al.* (2018). Single-nucleus and single-cell transcriptomes  
641 compared in matched cortical cell types. *PLoS One* 13, e0209648.

642 Dobin, A., Davis, C.A., Schlesinger, F., Drenkow, J., Zaleski, C., Jha, S., Batut, P., Chaisson, M.,  
643 and Gingeras, T.R. (2013). STAR: ultrafast universal RNA-seq aligner. *Bioinformatics* 29, 15-21.

644 Feng, J., Liu, T., Qin, B., Zhang, Y., and Liu, X.S. (2012). Identifying ChIP-seq enrichment using  
645 MACS. *Nat Protoc* 7, 1728-1740.

646 Liu C, Wu T, Fan F, et al. (2019). A portable and cost-effective microfluidic system for massively  
647 parallel single-cell transcriptome profiling. *BioRxiv*. 2019:818450.

648 Madisson, E., Wilbrey-Clark, A., Miragaia, R.J., Saeb-Parsy, K., Mahbubani, K.T.,  
649 Georgakopoulos, N., Harding, P., Polanski, K., Huang, N., Nowicki-Osuch, K., *et al.* (2019).  
650 scRNA-seq assessment of the human lung, spleen, and esophagus tissue stability after cold  
651 preservation. *Genome Biol* 21, 1.

652 Shen, W., Le, S., Li, Y., and Hu, F. (2016). SeqKit: A Cross-Platform and Ultrafast Toolkit for  
653 FASTA/Q File Manipulation. *PLoS One* 11, e0163962.

654 Stewart, B.J., Ferdinand, J.R., Young, M.D., Mitchell, T.J., Loudon, K.W., Riding, A.M., Richoz,  
655 N., Frazer, G.L., Staniforth, J.U.L., Vieira Braga, F.A., *et al.* (2019). Spatiotemporal immune  
656 zonation of the human kidney. *Science* 365, 1461-1466.

657 Stuart, T., Butler, A., Hoffman, P., Hafemeister, C., Papalexi, E., Mauck, W.M., 3rd, Hao, Y.,  
658 Stoerckius, M., Smibert, P., and Satija, R. (2019). Comprehensive Integration of Single-Cell  
659 Data. *Cell* 177, 1888-1902 e1821.

660 Tarasov, A., Vilella, A.J., Cuppen, E., Nijman, I.J., and Prins, P. (2015). Sambamba: fast  
661 processing of NGS alignment formats. *Bioinformatics* 31, 2032-2034.

662 Wolf, F.A., Angerer, P., and Theis, F.J. (2018). SCANPY: large-scale single-cell gene expression  
663 data analysis. *Genome Biol* 19, 15.

664 Aizarani, N., Saviano, A., Sagar, Mailly, L., Durand, S., Herman, J.S., Pessaux, P., Baumert, T.F.,  
665 and Grun, D. (2019). A human liver cell atlas reveals heterogeneity and epithelial progenitors.  
666 *Nature* 572, 199-204.

667 Bagheri, S.H.R., Asghari, A.M., Farhadi, M., Shamshiri, A.R., Kabir, A., Kamrava, S.K., Jalessi,  
668 M., Mohebbi, A., Alizadeh, R., Honarmand, A.A., *et al.* (2020). Coincidence of COVID-19  
669 epidemic and olfactory dysfunction outbreak. *medRxiv*, 2020.2003.2023.20041889.

670 Bakken, T.E., Hodge, R.D., Miller, J.A., Yao, Z., Nguyen, T.N., Aevermann, B., Barkan, E.,  
671 Bertagnolli, D., Casper, T., Dee, N., *et al.* (2018). Single-nucleus and single-cell transcriptomes  
672 compared in matched cortical cell types. *PLoS One* 13, e0209648.

673 Ball, H.J., Yuasa, H.J., Austin, C.J., Weiser, S., and Hunt, N.H. (2009). Indoleamine 2,3-  
674 dioxygenase-2; a new enzyme in the kynurenine pathway. *The international journal of*  
675 *biochemistry & cell biology* 41, 467-471.

676 Bao, L., Deng, W., Gao, H., Xiao, C., Liu, J., Xue, J., Lv, Q., Liu, J., Yu, P., Xu, Y., *et al.* (2020).  
677 Reinfection could not occur in SARS-CoV-2 infected rhesus macaques. *bioRxiv*,  
678 2020.2003.2013.990226.

- 679 Chan, J.F., Yuan, S., Kok, K.H., To, K.K., Chu, H., Yang, J., Xing, F., Liu, J., Yip, C.C., Poon, R.W.,  
680 *et al.* (2020). A familial cluster of pneumonia associated with the 2019 novel coronavirus  
681 indicating person-to-person transmission: a study of a family cluster. *Lancet* 395, 514-523.
- 682 Chu, P.L., Gigliotti, J.C., Cechova, S., Bodonyi-Kovacs, G., Chan, F., Ralph, D.L., Howell, N.,  
683 Kalantari, K., Klibanov, A.L., Carey, R.M., *et al.* (2017). Renal Collectrin Protects against Salt-  
684 Sensitive Hypertension and Is Downregulated by Angiotensin II. *J Am Soc Nephrol* 28, 1826-  
685 1837.
- 686 Conti, P., Ronconi, G., Caraffa, A., Gallenga, C.E., Ross, R., Frydas, I., and Kritas, S.K. (2020).  
687 Induction of pro-inflammatory cytokines (IL-1 and IL-6) and lung inflammation by  
688 Coronavirus-19 (COVI-19 or SARS-CoV-2): anti-inflammatory strategies. *J Biol Regul Homeost*  
689 *Agents* 34.
- 690 Cui, J., Li, F., and Shi, Z.L. (2019). Origin and evolution of pathogenic coronaviruses. *Nat Rev*  
691 *Microbiol* 17, 181-192.
- 692 Delmas, B., Gelfi, J., L'Haridon, R., Vogel, L.K., Sjostrom, H., Noren, O., and Laude, H. (1992).  
693 Aminopeptidase N is a major receptor for the entero-pathogenic coronavirus TGEV. *Nature*  
694 357, 417-420.
- 695 Dobin, A., Davis, C.A., Schlesinger, F., Drenkow, J., Zaleski, C., Jha, S., Batut, P., Chaisson, M.,  
696 and Gingeras, T.R. (2013). STAR: ultrafast universal RNA-seq aligner. *Bioinformatics* 29, 15-21.
- 697 Feng, J., Liu, T., Qin, B., Zhang, Y., and Liu, X.S. (2012). Identifying ChIP-seq enrichment using  
698 MACS. *Nat Protoc* 7, 1728-1740.
- 699 Guo, Y.R., Cao, Q.D., Hong, Z.S., Tan, Y.Y., Chen, S.D., Jin, H.J., Tan, K.S., Wang, D.Y., and Yan,  
700 Y. (2020). The origin, transmission and clinical therapies on coronavirus disease 2019 (COVID-  
701 19) outbreak - an update on the status. *Mil Med Res* 7, 11.
- 702 Hamm, H., Fabel, H., and Bartsch, W. (1992). The surfactant system of the adult lung:  
703 physiology and clinical perspectives. *Clin Investig* 70, 637-657.
- 704 Hamming, I., Timens, W., Bulthuis, M.L., Lely, A.T., Navis, G., and van Goor, H. (2004). Tissue  
705 distribution of ACE2 protein, the functional receptor for SARS coronavirus. A first step in  
706 understanding SARS pathogenesis. *J Pathol* 203, 631-637.
- 707 Han, X., Wang, R., Zhou, Y., Fei, L., Sun, H., Lai, S., Saadatpour, A., Zhou, Z., Chen, H., Ye, F., *et*  
708 *al.* (2018). Mapping the Mouse Cell Atlas by Microwell-Seq. *Cell* 172, 1091-1107 e1017.
- 709 Han, X., Zhou, Z., Fei, L., Sun, H., Wang, R., Chen, Y., Chen, H., Wang, J., Tang, H., Ge, W., *et al.*  
710 (2020). Construction of a human cell landscape at single-cell level. *Nature*.
- 711 Heinrich, P.C., Castell, J.V., and Andus, T. (1990). Interleukin-6 and the acute phase response.  
712 *The Biochemical journal* 265, 621-636.
- 713 Hoffmann, M., Kleine-Weber, H., Schroeder, S., Kruger, N., Herrler, T., Erichsen, S., Schiergens,  
714 T.S., Herrler, G., Wu, N.H., Nitsche, A., *et al.* (2020). SARS-CoV-2 Cell Entry Depends on ACE2  
715 and TMPRSS2 and Is Blocked by a Clinically Proven Protease Inhibitor. *Cell*.
- 716 Jia, H.P., Look, D.C., Shi, L., Hickey, M., Pewe, L., Netland, J., Farzan, M., Wohlford-Lenane, C.,  
717 Perlman, S., and McCray, P.B., Jr. (2005). ACE2 receptor expression and severe acute  
718 respiratory syndrome coronavirus infection depend on differentiation of human airway  
719 epithelia. *J Virol* 79, 14614-14621.
- 720 Kim, T.S., Heinlein, C., Hackman, R.C., and Nelson, P.S. (2006). Phenotypic analysis of mice  
721 lacking the Tmprss2-encoded protease. *Mol Cell Biol* 26, 965-975.
- 722 Kock, R.A., Begovoeva, M., Ansumana, R., and Suluku, R. (2019). Searching for the source of  
723 Ebola: the elusive factors driving its spillover into humans during the West African outbreak  
724 of 2013-2016. *Rev Sci Tech* 38, 113-122.

725 Lau, S.K., Woo, P.C., Li, K.S., Huang, Y., Tsoi, H.W., Wong, B.H., Wong, S.S., Leung, S.Y., Chan,  
726 K.H., and Yuen, K.Y. (2005). Severe acute respiratory syndrome coronavirus-like virus in  
727 Chinese horseshoe bats. *Proc Natl Acad Sci U S A* *102*, 14040-14045.

728 Lee, J.W., Chou, C.L., and Knepper, M.A. (2015). Deep Sequencing in Microdissected Renal  
729 Tubules Identifies Nephron Segment-Specific Transcriptomes. *J Am Soc Nephrol* *26*, 2669-  
730 2677.

731 Lepiller, Q., Soulier, E., Li, Q., Lambotin, M., Barths, J., Fuchs, D., Stoll-Keller, F., Liang, T.J., and  
732 Barth, H. (2015). Antiviral and Immunoregulatory Effects of Indoleamine-2,3-Dioxygenase in  
733 Hepatitis C Virus Infection. *J Innate Immun* *7*, 530-544.

734 Li, Z., Wu, M., Yao, J., Guo, J., Liao, X., Song, S., Li, J., Duan, G., Zhou, Y., Wu, X., *et al.* (2020).  
735 Caution on Kidney Dysfunctions of COVID-19 Patients. *medRxiv*, 2020.2002.2008.20021212.

736 Liu, C., Wu, T., Fan, F., Liu, Y., Wu, L., Junkin, M., Wang, Z., Yu, Y., Wang, W., Wei, W., *et al.*  
737 (2019). A portable and cost-effective microfluidic system for massively parallel single-cell  
738 transcriptome profiling. *bioRxiv*, 818450.

739 Madissoon, E., Wilbrey-Clark, A., Miragaia, R.J., Saeb-Parsy, K., Mahbubani, K.T.,  
740 Georgakopoulos, N., Harding, P., Polanski, K., Huang, N., Nowicki-Osuch, K., *et al.* (2019).  
741 scRNA-seq assessment of the human lung, spleen, and esophagus tissue stability after cold  
742 preservation. *Genome Biol* *21*, 1.

743 Mason, R.J., and Williams, M.C. (1977). Type II alveolar cell. Defender of the alveolus. *Am Rev*  
744 *Respir Dis* *115*, 81-91.

745 Mosteiro, L., Pantoja, C., de Martino, A., and Serrano, M. (2018). Senescence promotes in vivo  
746 reprogramming through p16(INK)(4a) and IL-6. *Aging Cell* *17*.

747 Naicker, S., Yang, C.W., Hwang, S.J., Liu, B.C., Chen, J.H., and Jha, V. (2020). The Novel  
748 Coronavirus 2019 epidemic and kidneys. *Kidney Int*.

749 Ong, J., Young, B.E., and Ong, S. (2020). COVID-19 in gastroenterology: a clinical perspective.  
750 *Gut*, Epub ahead of print.

751 Peiris, J.S., Lai, S.T., Poon, L.L., Guan, Y., Yam, L.Y., Lim, W., Nicholls, J., Yee, W.K., Yan, W.W.,  
752 Cheung, M.T., *et al.* (2003). Coronavirus as a possible cause of severe acute respiratory  
753 syndrome. *Lancet* *361*, 1319-1325.

754 Reusken, C.B., Haagmans, B.L., Muller, M.A., Gutierrez, C., Godeke, G.J., Meyer, B., Muth, D.,  
755 Raj, V.S., Smits-De Vries, L., Corman, V.M., *et al.* (2013). Middle East respiratory syndrome  
756 coronavirus neutralising serum antibodies in dromedary camels: a comparative serological  
757 study. *Lancet Infect Dis* *13*, 859-866.

758 Rothe, C., Schunk, M., Sothmann, P., Bretzel, G., Froeschl, G., Wallrauch, C., Zimmer, T., Thiel,  
759 V., Janke, C., Guggemos, W., *et al.* (2020). Transmission of 2019-nCoV Infection from an  
760 Asymptomatic Contact in Germany. *The New England journal of medicine* *382*, 970-971.

761 Santer, R., and Calado, J. (2010). Familial renal glucosuria and SGLT2: from a mendelian trait  
762 to a therapeutic target. *Clin J Am Soc Nephrol* *5*, 133-141.

763 Shang, J., Ye, G., Shi, K., Wan, Y., Luo, C., Aihara, H., Geng, Q., Auerbach, A., and Li, F. (2020).  
764 Structural basis of receptor recognition by SARS-CoV-2. *Nature*.

765 Shen, W., Le, S., Li, Y., and Hu, F. (2016). SeqKit: A Cross-Platform and Ultrafast Toolkit for  
766 FASTA/Q File Manipulation. *PLoS One* *11*, e0163962.

767 Sigdel, T.K., Shoemaker, L.D., Chen, R., Li, L., Butte, A.J., Sarwal, M.M., and Steinberg, G.K.  
768 (2013). Immune response profiling identifies autoantibodies specific to Moyamoya patients.  
769 *Orphanet journal of rare diseases* *8*, 45.



770 Stewart, B.J., Ferdinand, J.R., Young, M.D., Mitchell, T.J., Loudon, K.W., Riding, A.M., Richoz,  
771 N., Frazer, G.L., Staniforth, J.U.L., Vieira Braga, F.A., *et al.* (2019). Spatiotemporal immune  
772 zonation of the human kidney. *Science* 365, 1461-1466.

773 Stuart, T., Butler, A., Hoffman, P., Hafemeister, C., Papalexi, E., Mauck, W.M., 3rd, Hao, Y.,  
774 Stoeckius, M., Smibert, P., and Satija, R. (2019). Comprehensive Integration of Single-Cell  
775 Data. *Cell* 177, 1888-1902 e1821.

776 Su, S., Wong, G., Shi, W., Liu, J., Lai, A.C.K., Zhou, J., Liu, W., Bi, Y., and Gao, G.F. (2016).  
777 Epidemiology, Genetic Recombination, and Pathogenesis of Coronaviruses. *Trends Microbiol*  
778 24, 490-502.

779 Tarasov, A., Vilella, A.J., Cuppen, E., Nijman, I.J., and Prins, P. (2015). Sambamba: fast  
780 processing of NGS alignment formats. *Bioinformatics* 31, 2032-2034.

781 Turner, A.J., Hiscox, J.A., and Hooper, N.M. (2004). ACE2: from vasopeptidase to SARS virus  
782 receptor. *Trends Pharmacol Sci* 25, 291-294.

783 Villiger, P.M., Adler, S., Kuchen, S., Wermelinger, F., Dan, D., Fiege, V., Butikofer, L., Seitz, M.,  
784 and Reichenbach, S. (2016). Tocilizumab for induction and maintenance of remission in giant  
785 cell arteritis: a phase 2, randomised, double-blind, placebo-controlled trial. *Lancet* 387, 1921-  
786 1927.

787 Walls, A.C., Park, Y.J., Tortorici, M.A., Wall, A., McGuire, A.T., and Velesler, D. (2020). Structure,  
788 Function, and Antigenicity of the SARS-CoV-2 Spike Glycoprotein. *Cell*, Epub ahead of print.

789 Wan, S., Yi, Q., Fan, S., Lv, J., Zhang, X., Guo, L., Lang, C., Xiao, Q., Xiao, K., Yi, Z., *et al.* (2020).  
790 Characteristics of lymphocyte subsets and cytokines in peripheral blood of 123 hospitalized  
791 patients with 2019 novel coronavirus pneumonia (NCP). *medRxiv*, 2020.2002.2010.20021832.

792 Wentworth, D.E., and Holmes, K.V. (2001). Molecular determinants of species specificity in  
793 the coronavirus receptor aminopeptidase N (CD13): influence of N-linked glycosylation. *J Virol*  
794 75, 9741-9752.

795 Wilson, J.G., Liu, K.D., Zhuo, H., Caballero, L., McMillan, M., Fang, X., Cosgrove, K., Vojnik, R.,  
796 Calfee, C.S., Lee, J.W., *et al.* (2015). Mesenchymal stem (stromal) cells for treatment of ARDS:  
797 a phase 1 clinical trial. *Lancet Respir Med* 3, 24-32.

798 Wolf, F.A., Angerer, P., and Theis, F.J. (2018). SCANPY: large-scale single-cell gene expression  
799 data analysis. *Genome Biol* 19, 15.

800 Yu, L., Lv, J.C., Zhou, X.J., Zhu, L., Hou, P., and Zhang, H. (2011). Abnormal expression and  
801 dysfunction of novel SGLT2 mutations identified in familial renal glucosuria patients. *Hum*  
802 *Genet* 129, 335-344.

803 Zheng, M., Gao, Y., Wang, G., Song, G., Liu, S., Sun, D., Xu, Y., and Tian, Z. (2020). Functional  
804 exhaustion of antiviral lymphocytes in COVID-19 patients. *Cell Mol Immunol*, Epub ahead of  
805 print.

806 Zhu, N., Zhang, D., Wang, W., Li, X., Yang, B., Song, J., Zhao, X., Huang, B., Shi, W., Lu, R., *et al.*  
807 (2020). A Novel Coronavirus from Patients with Pneumonia in China, 2019. *The New England*  
808 *journal of medicine* 382, 727-733.

809

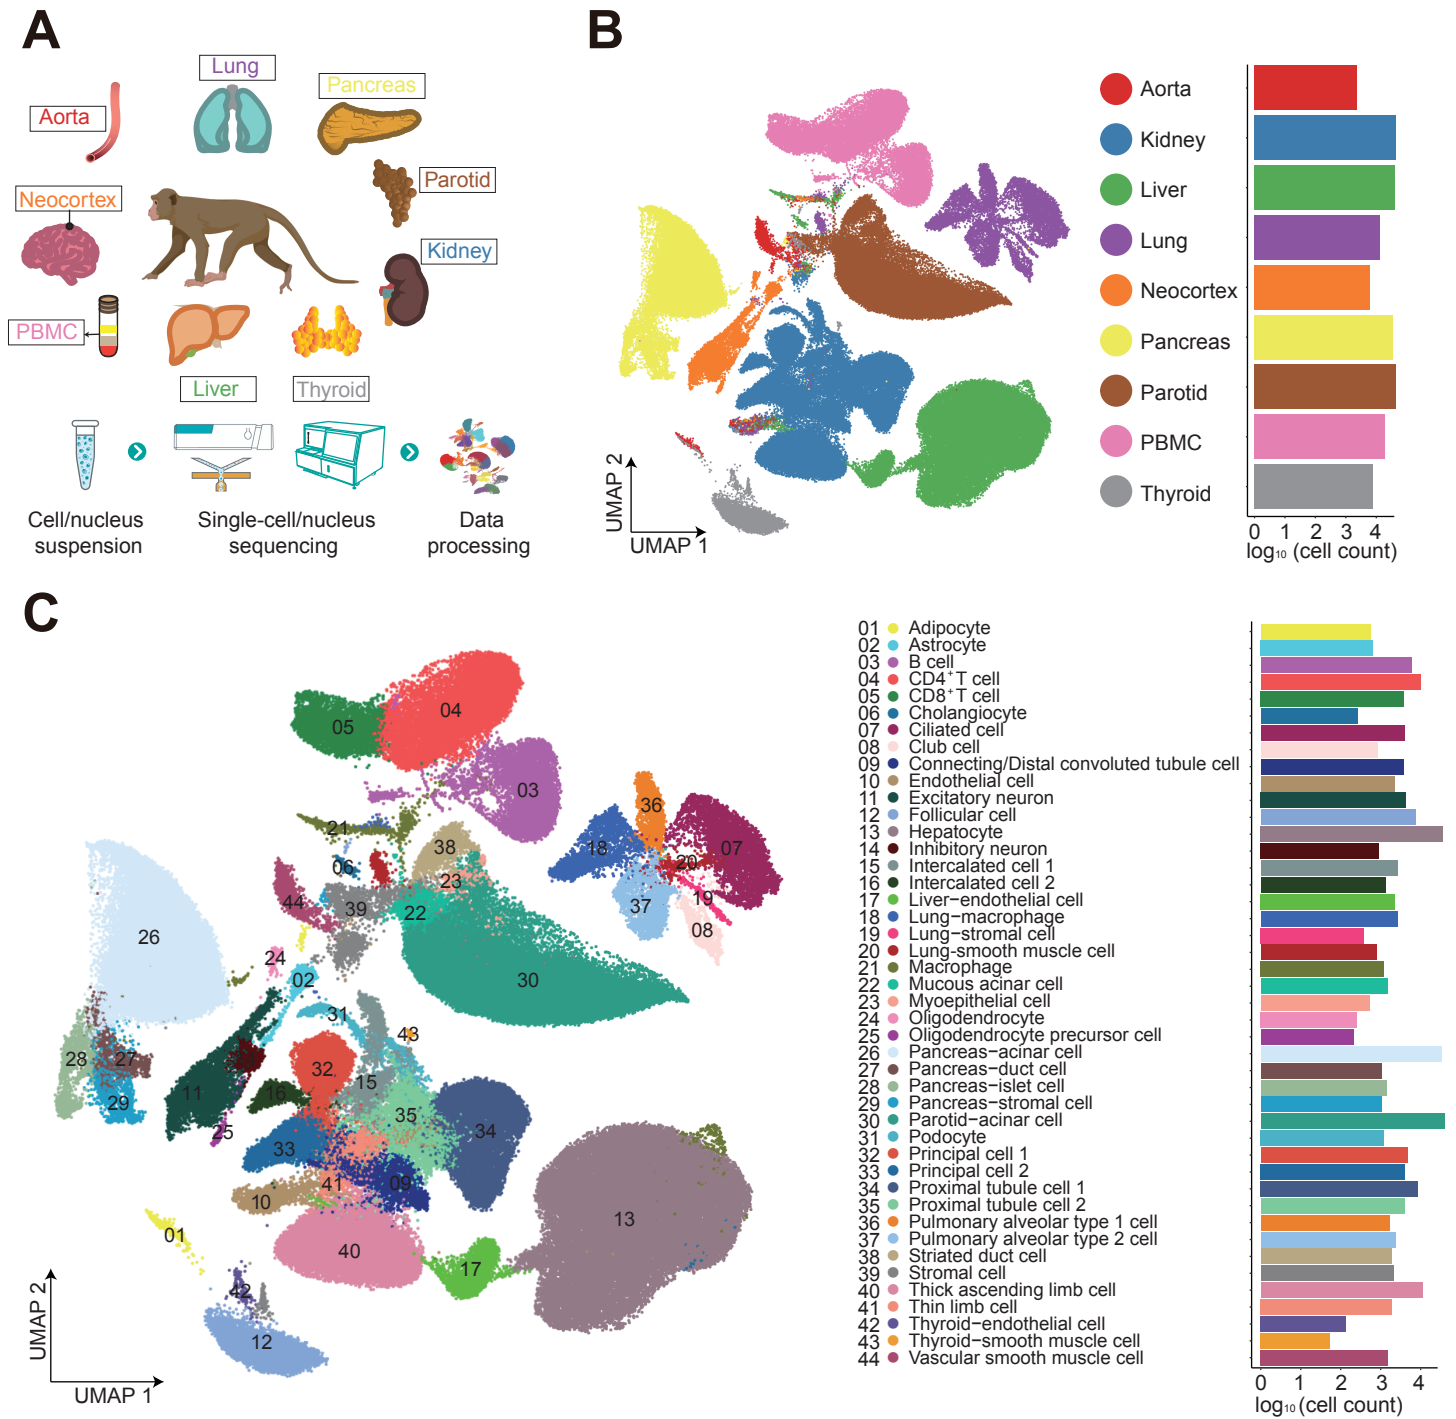

**Figure 1**

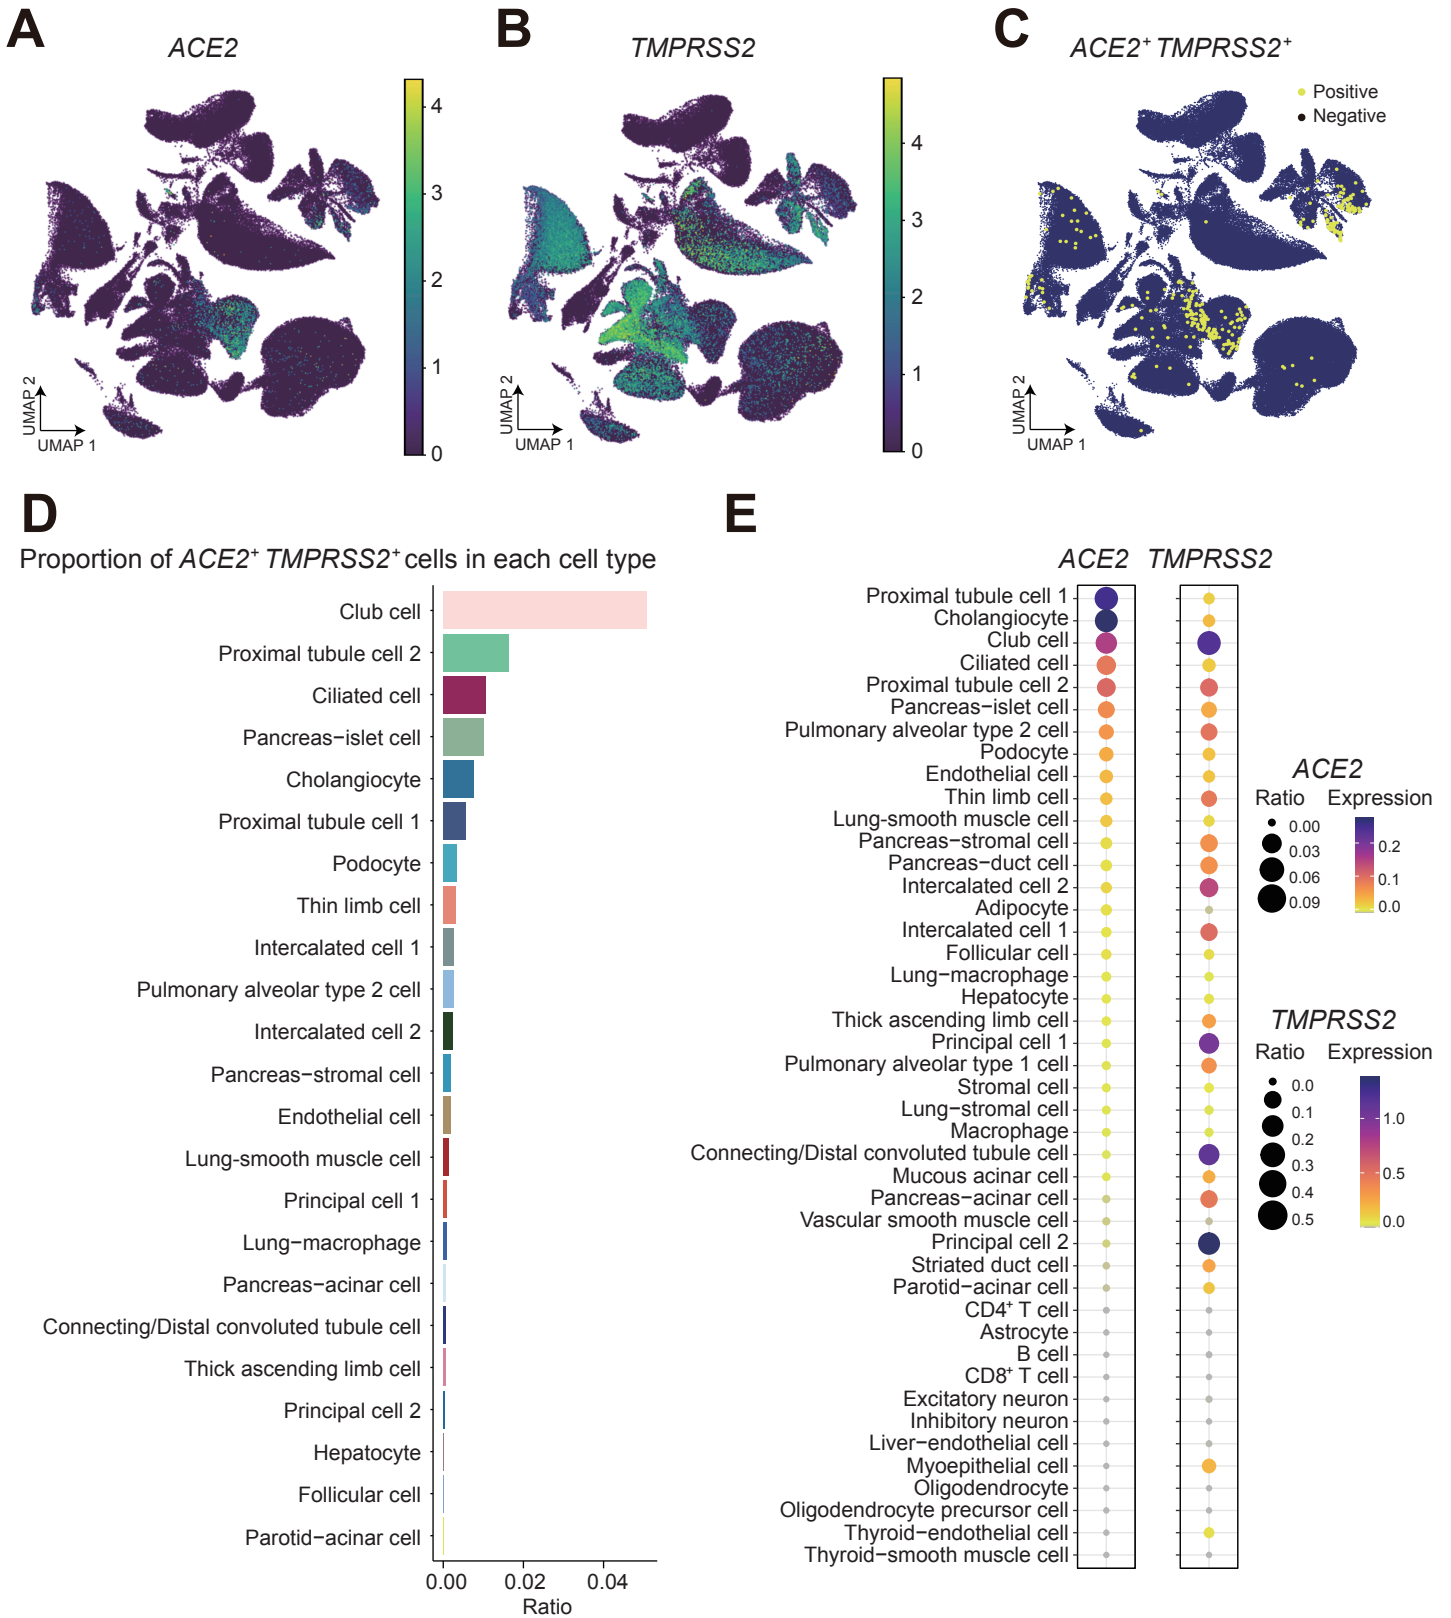

**Figure 2**



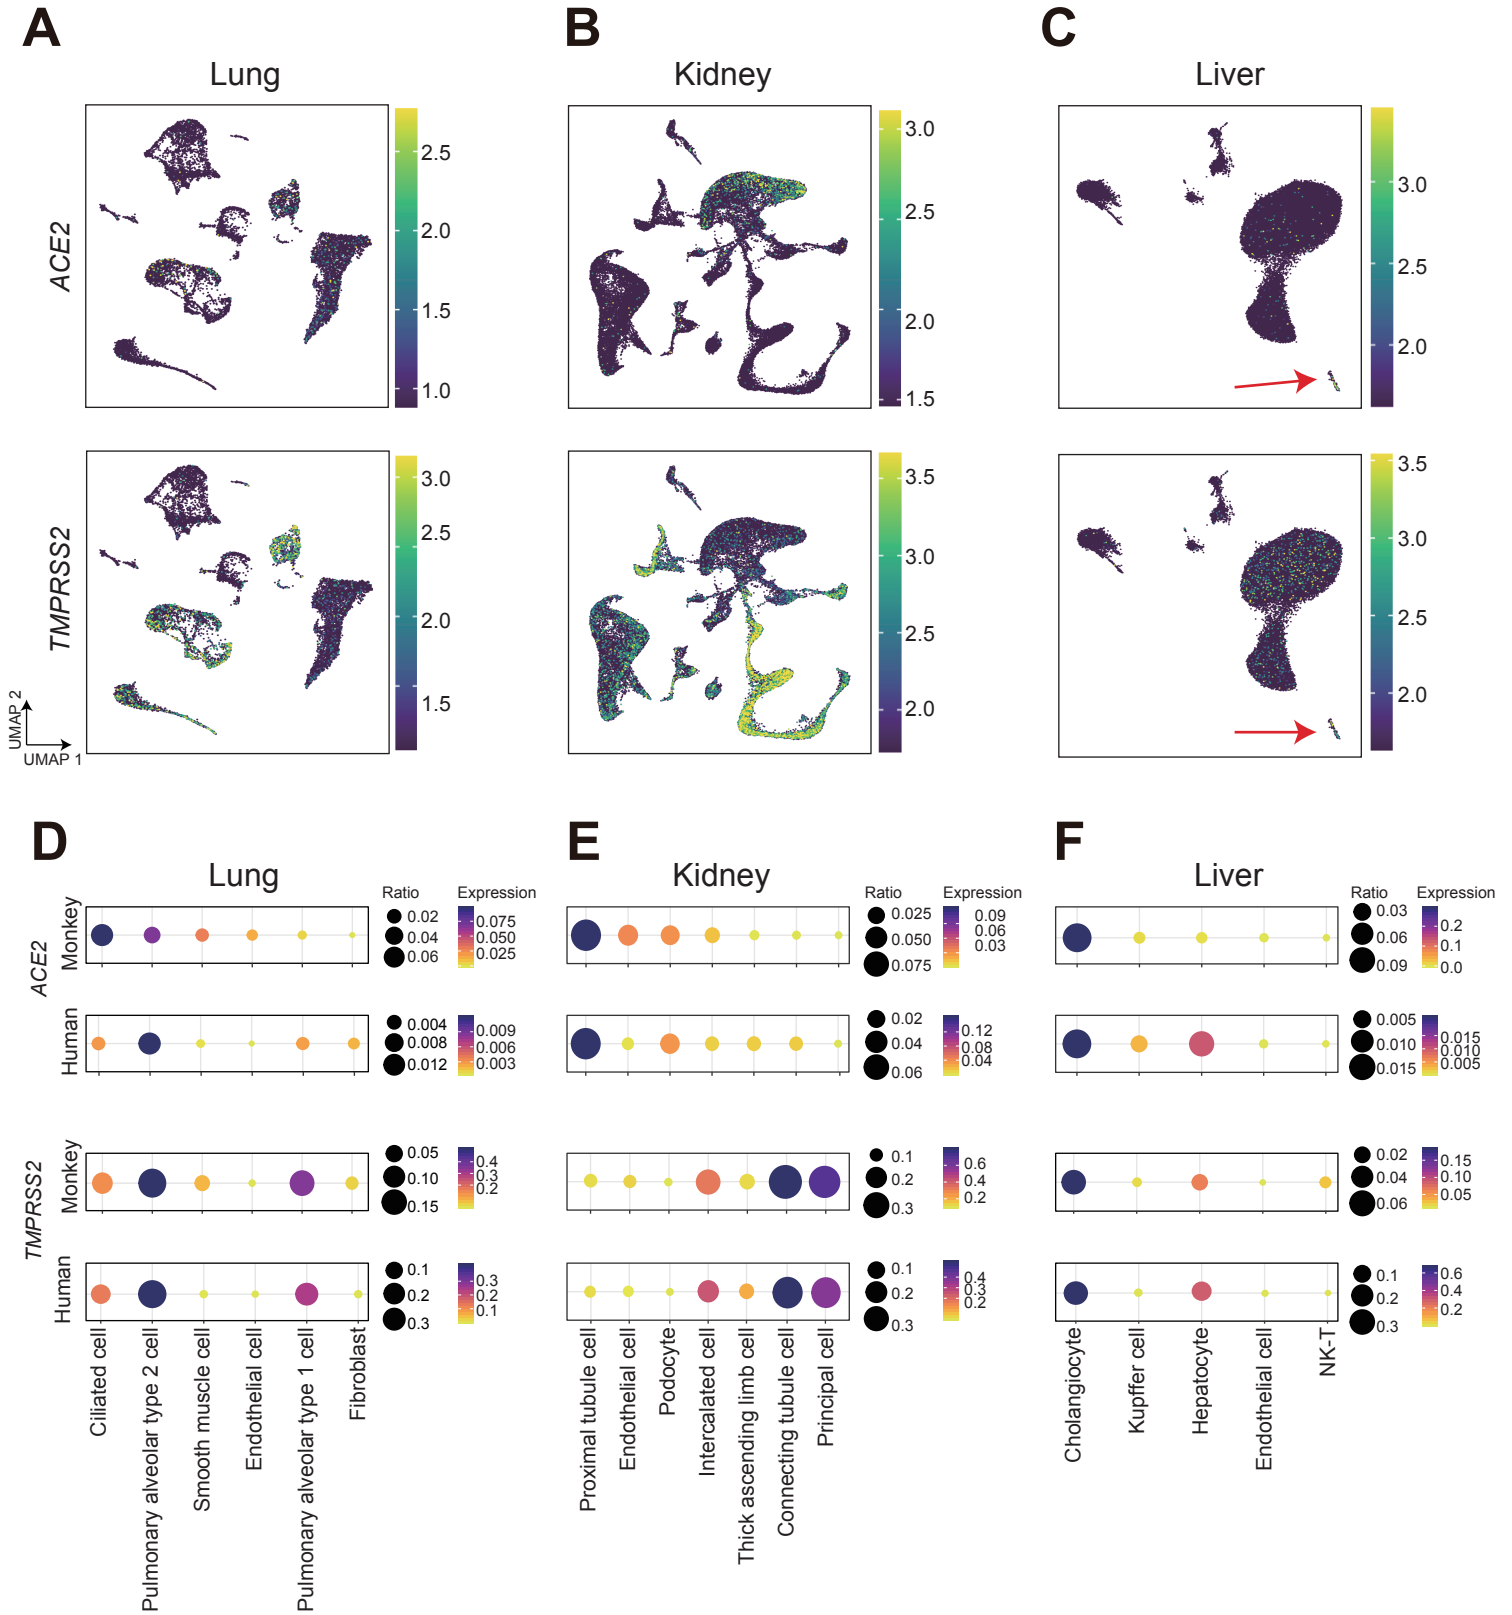

**Figure 3**

**A**

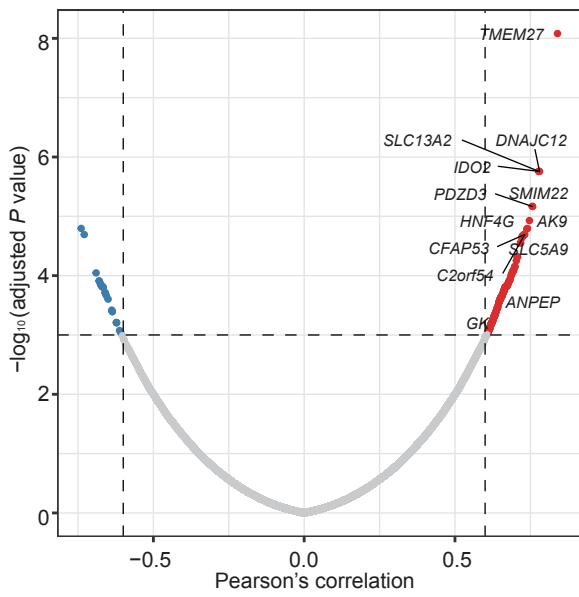

**B**

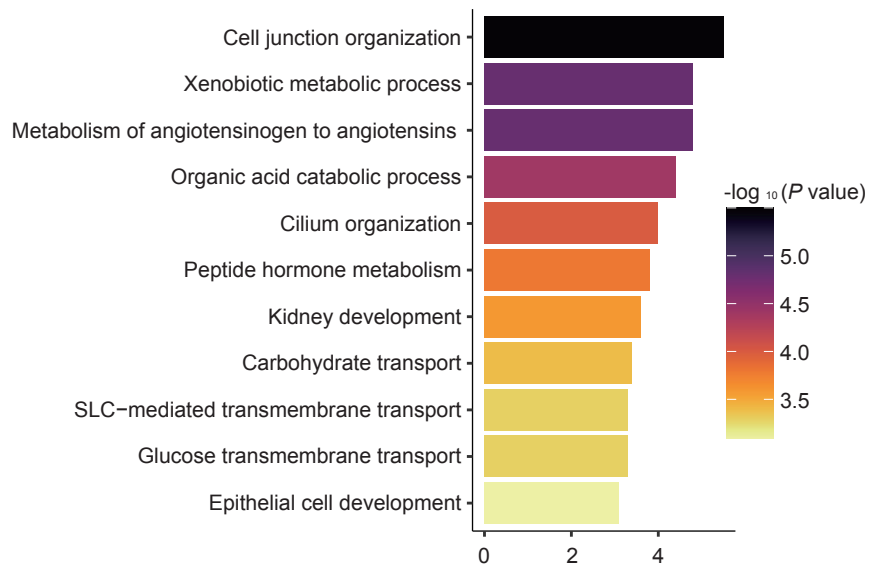

**C**

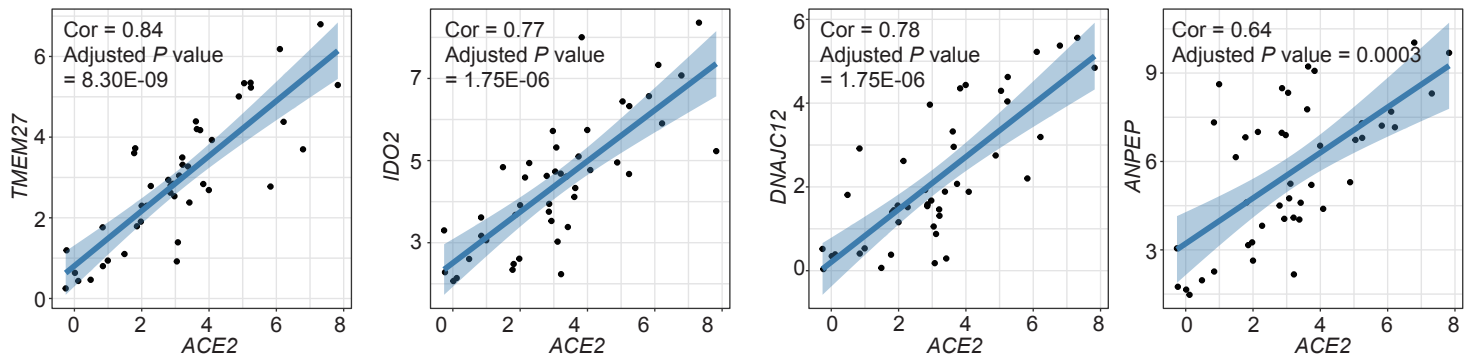

**D**

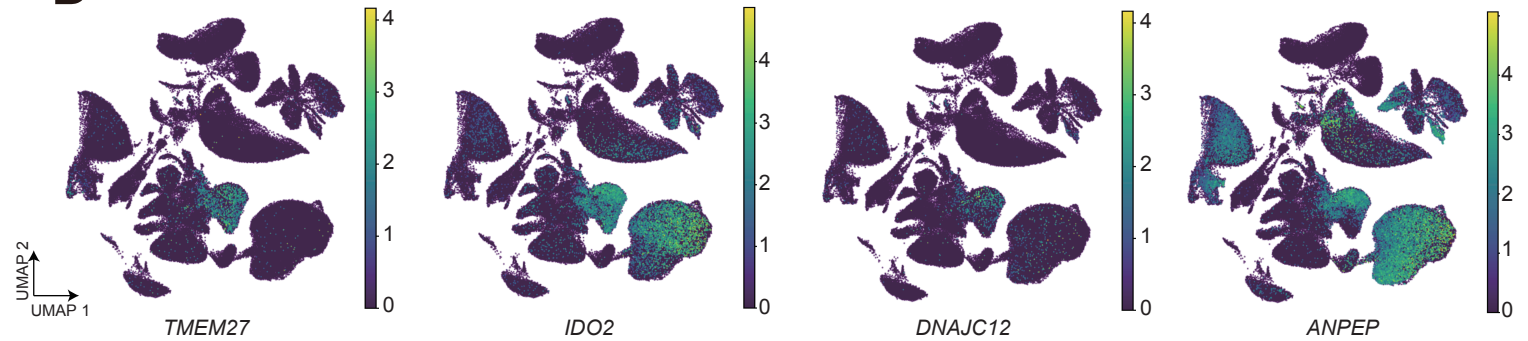

**Figure 4**

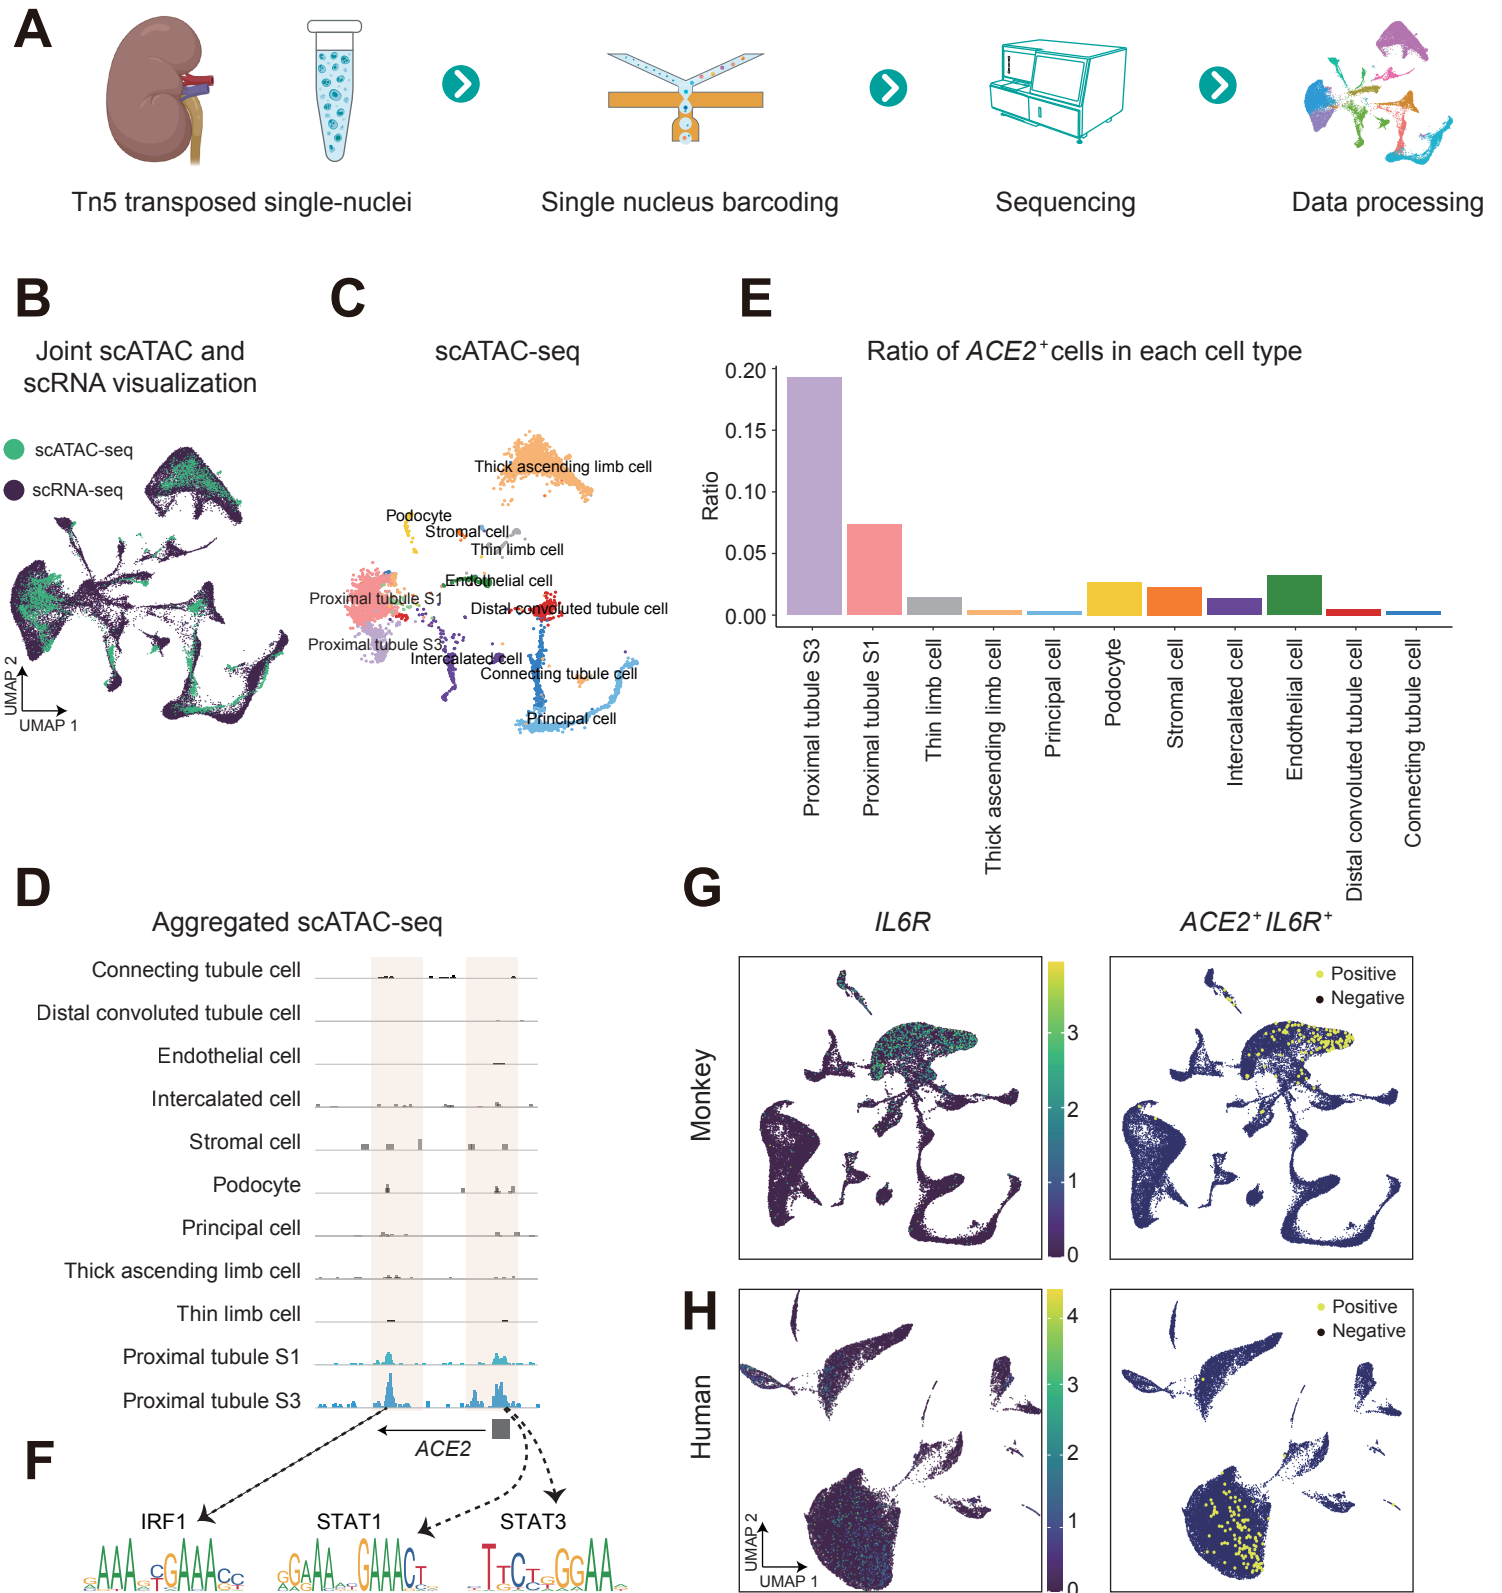

Figure 5

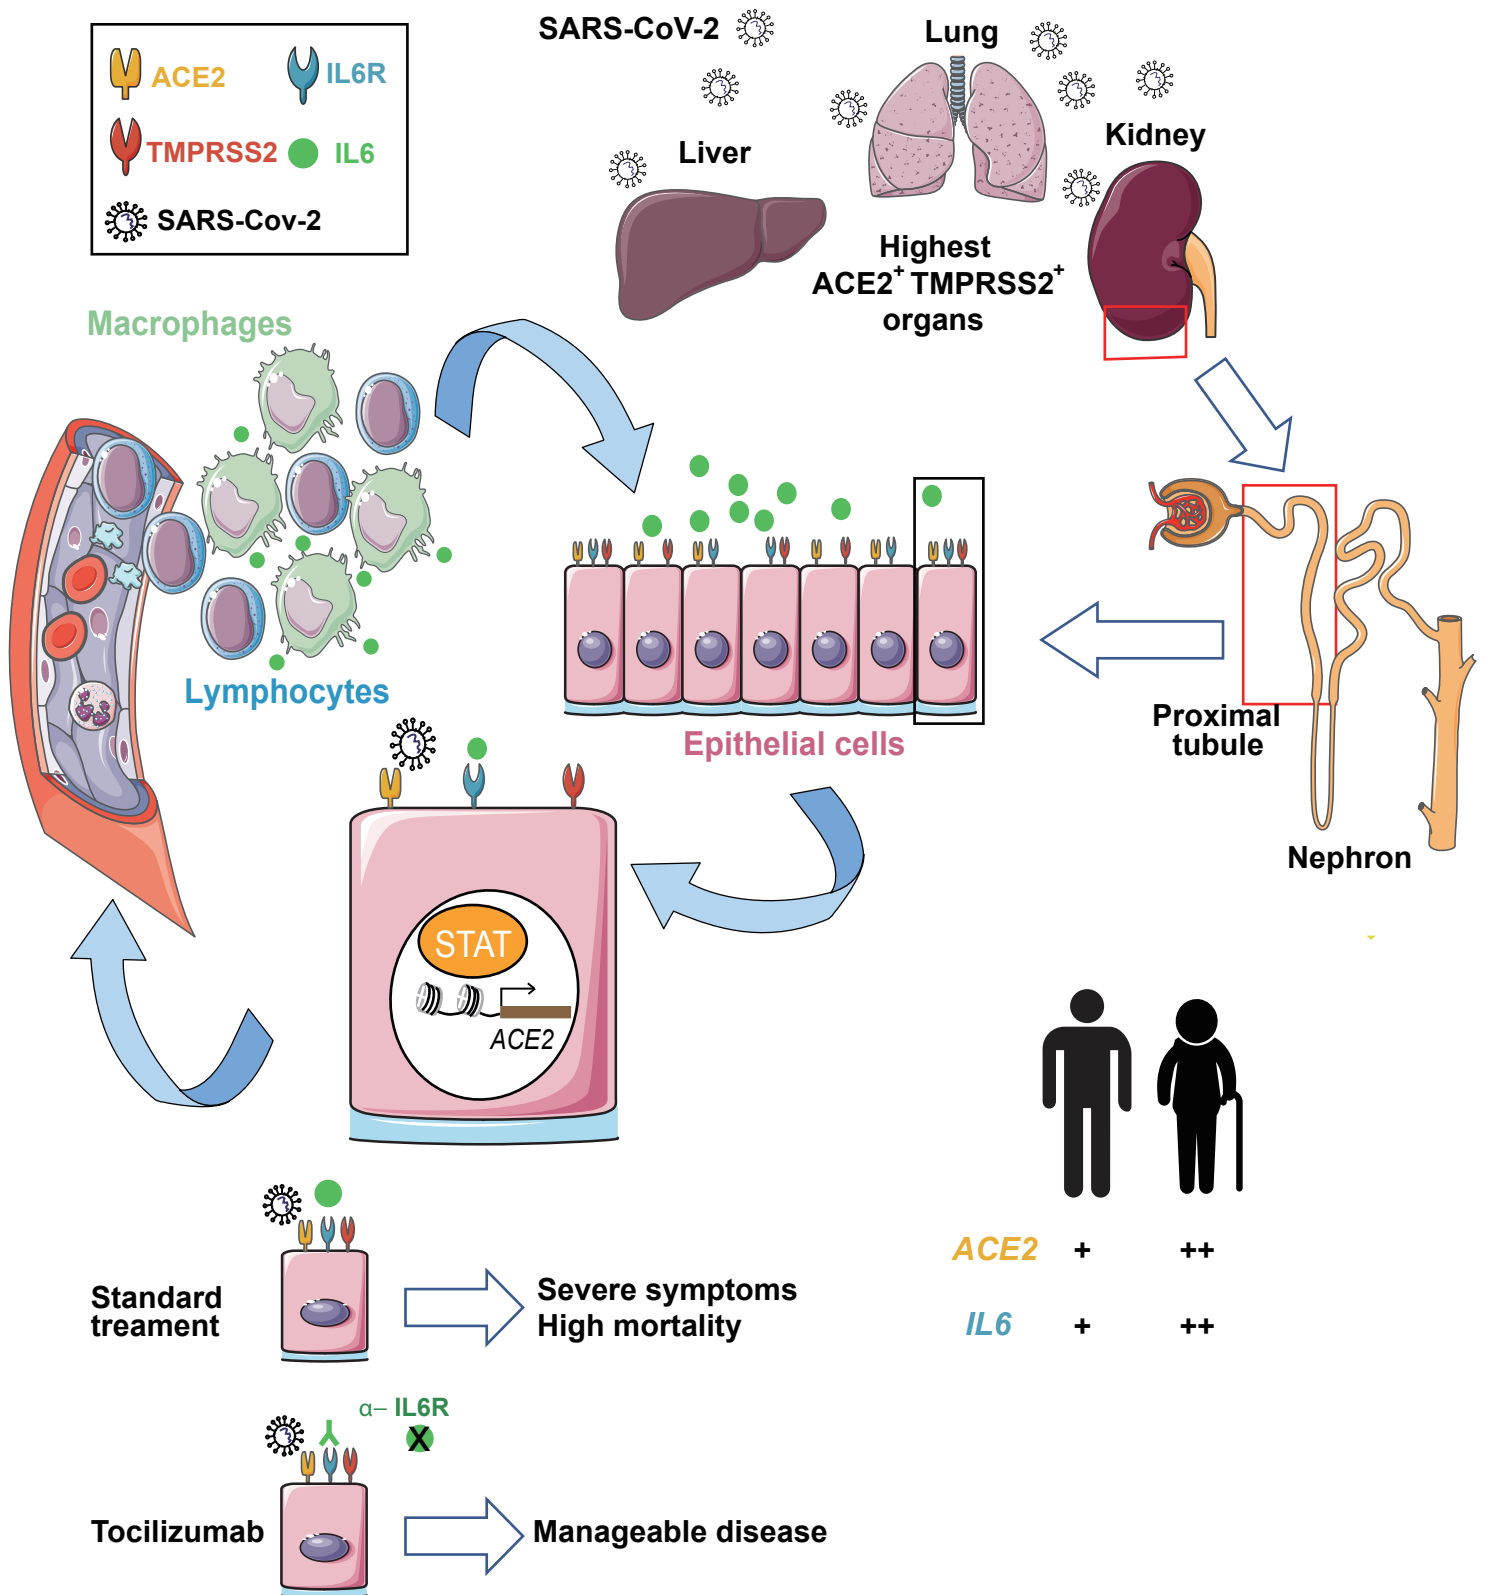

Figure 6

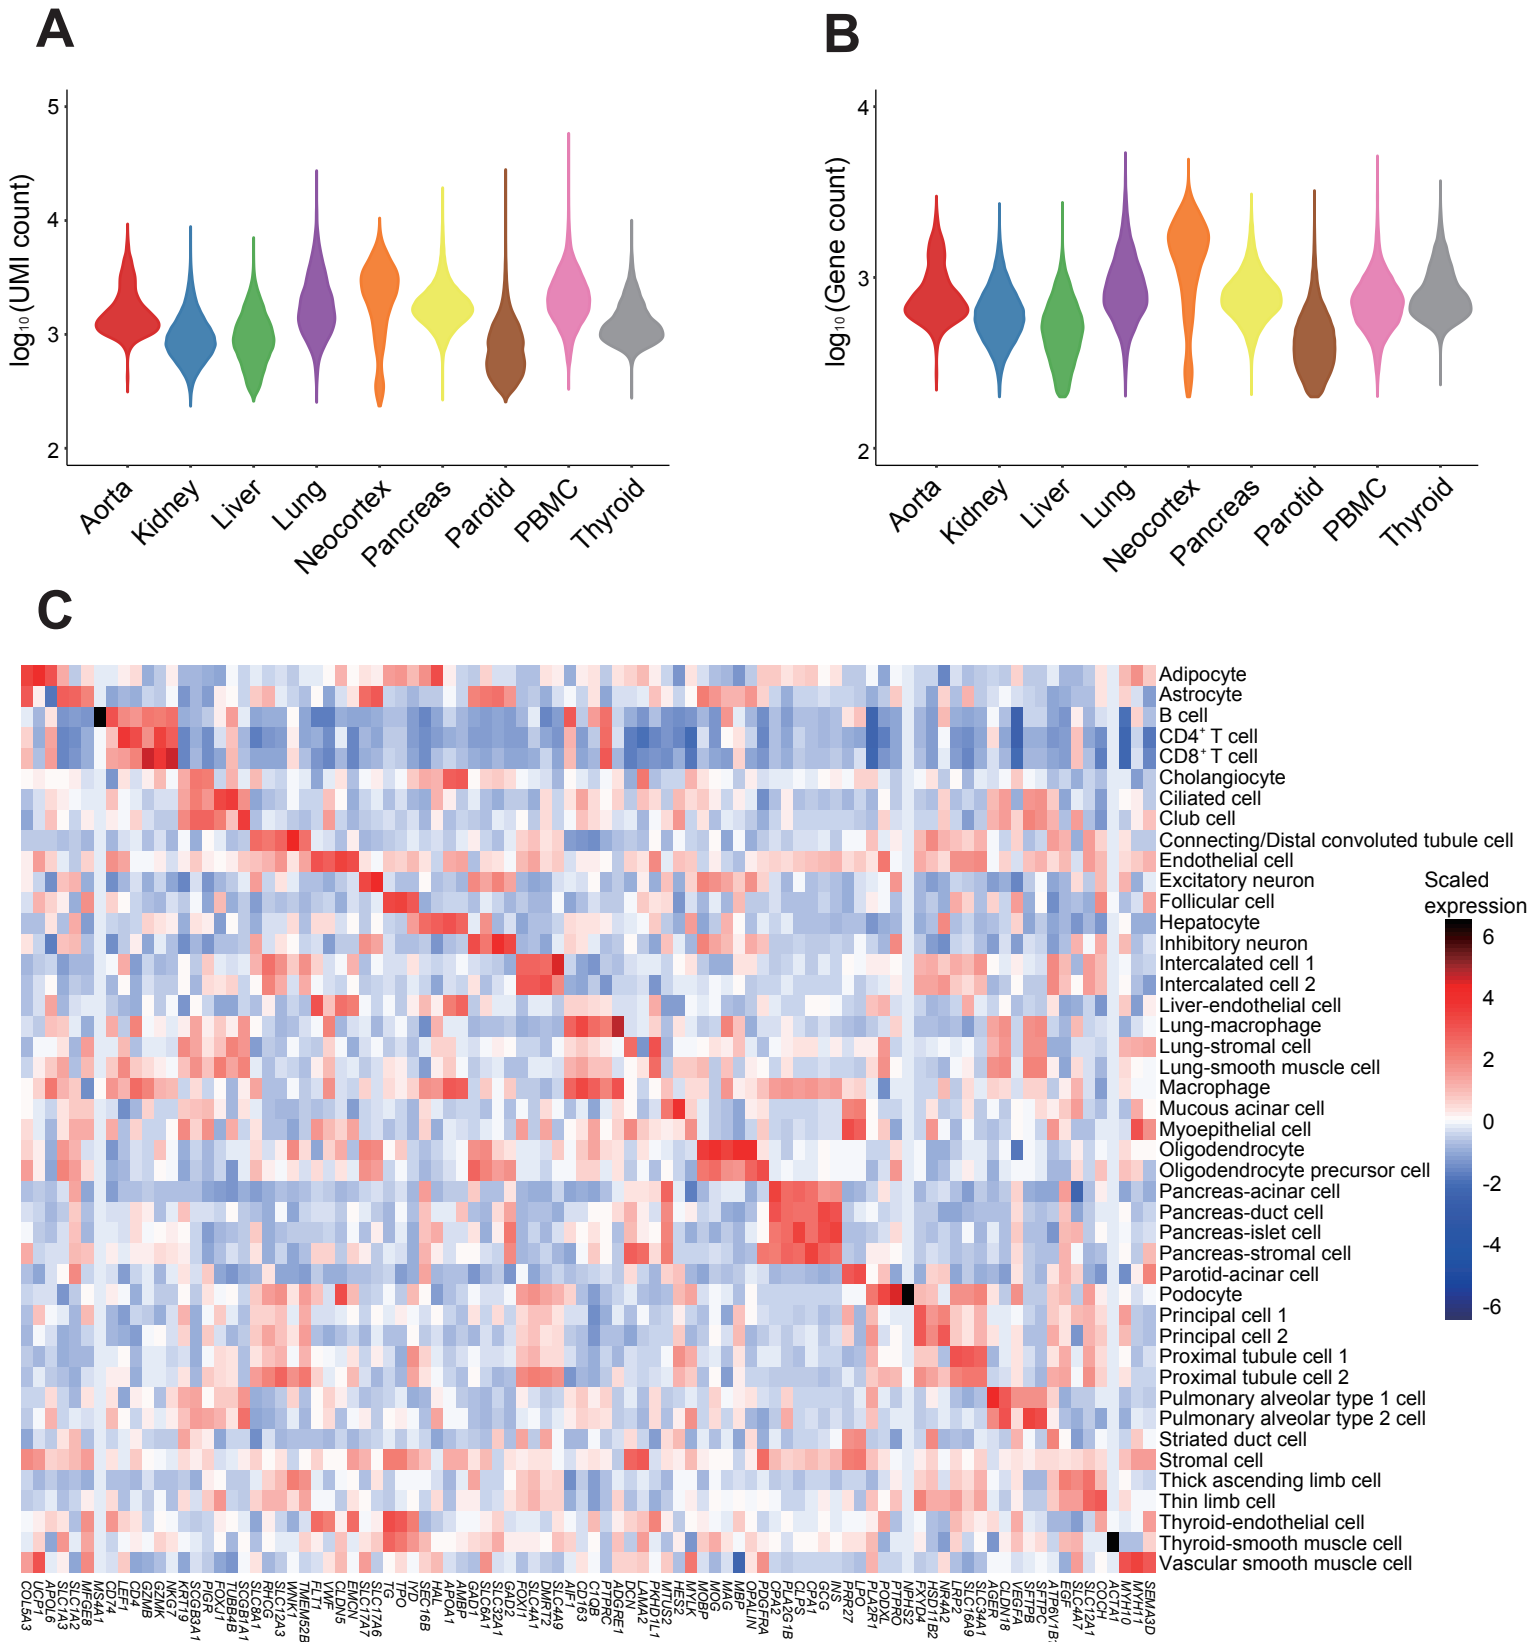

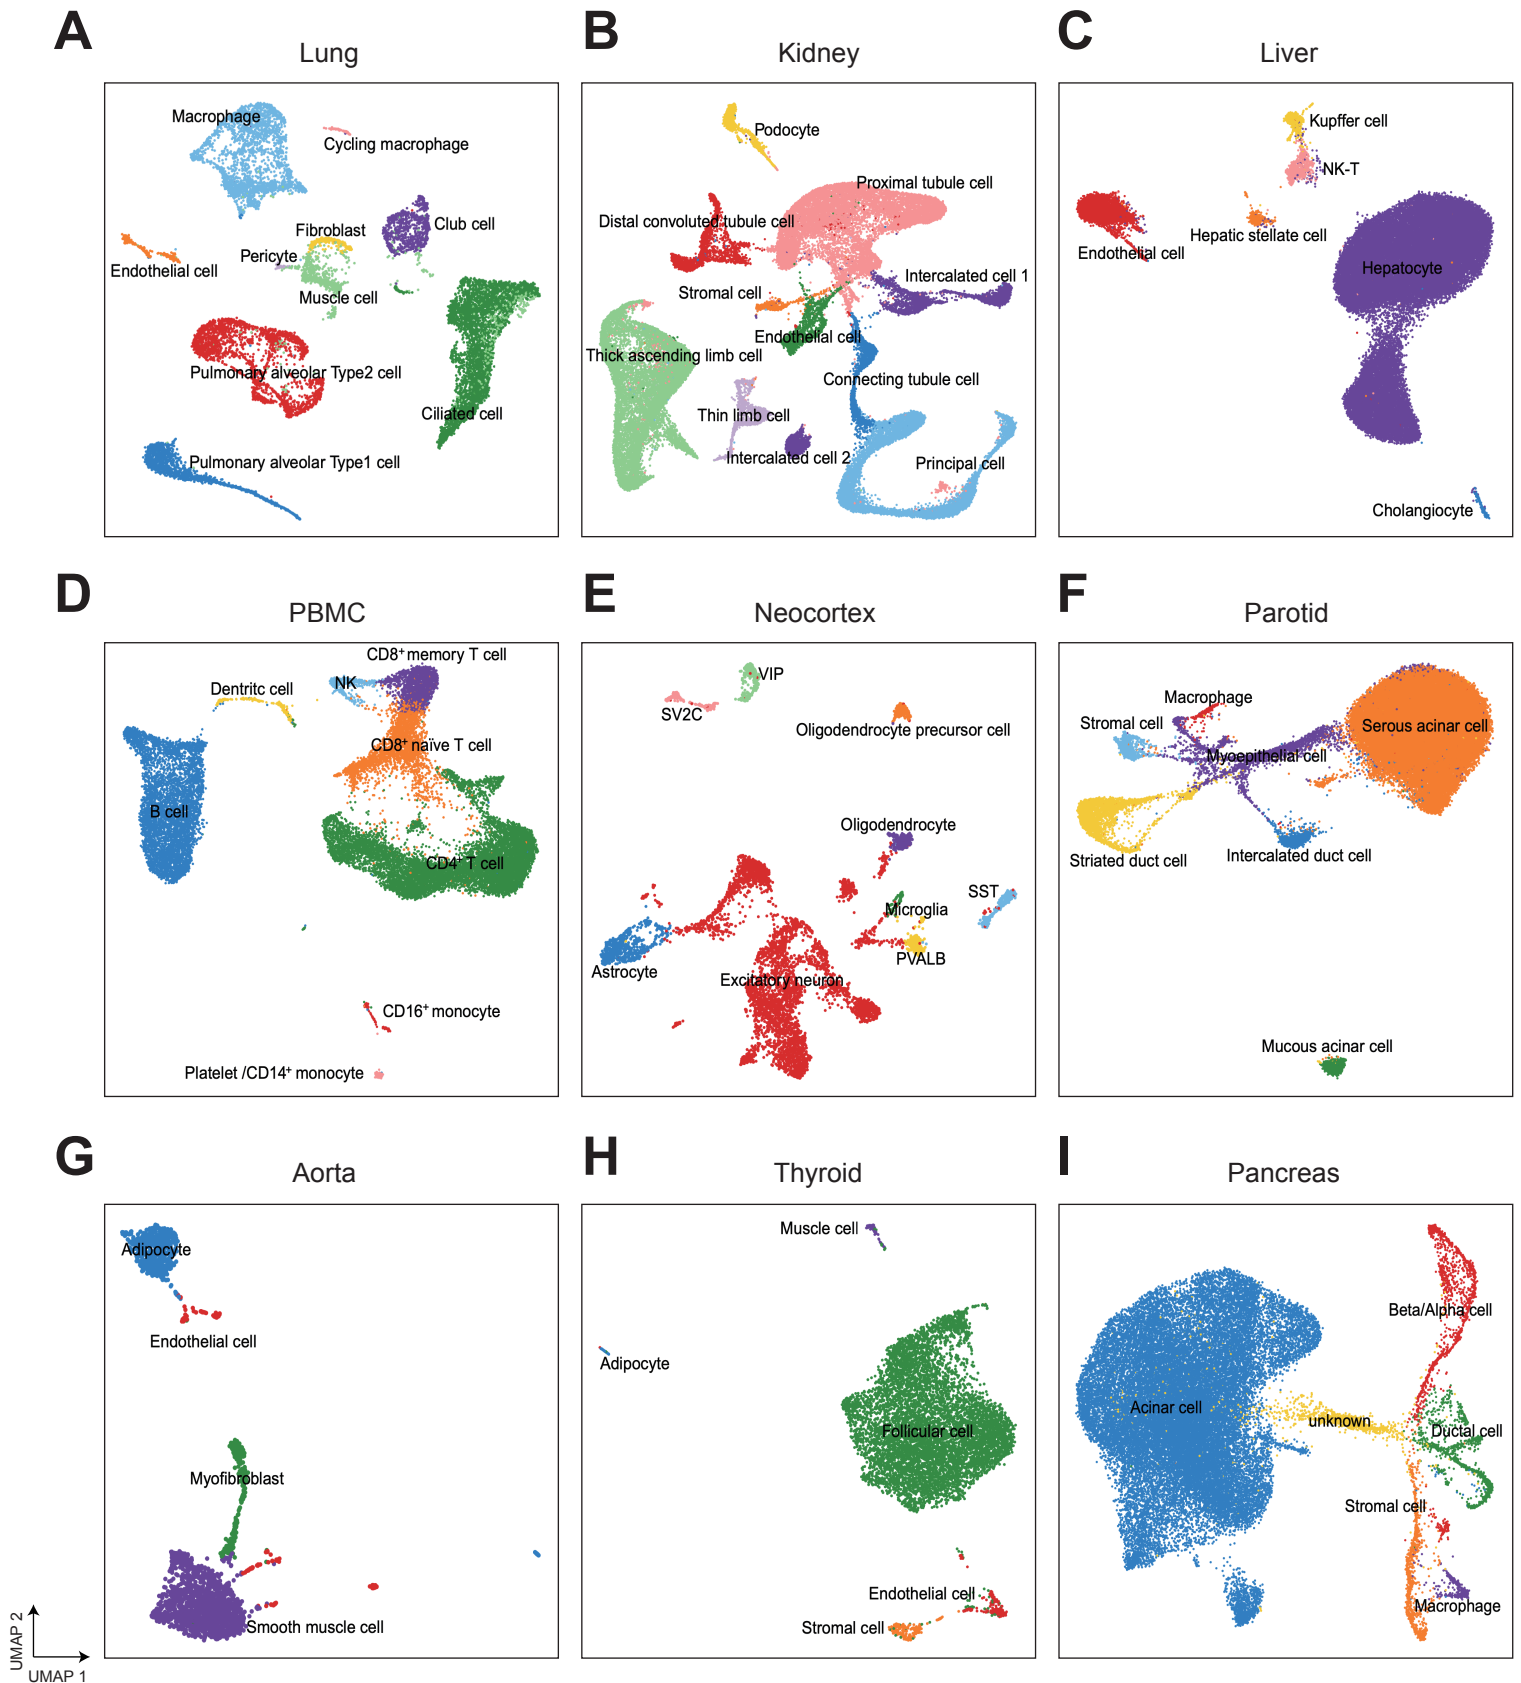



**A**

*ACE2*

**B**

*TMPRSS2*

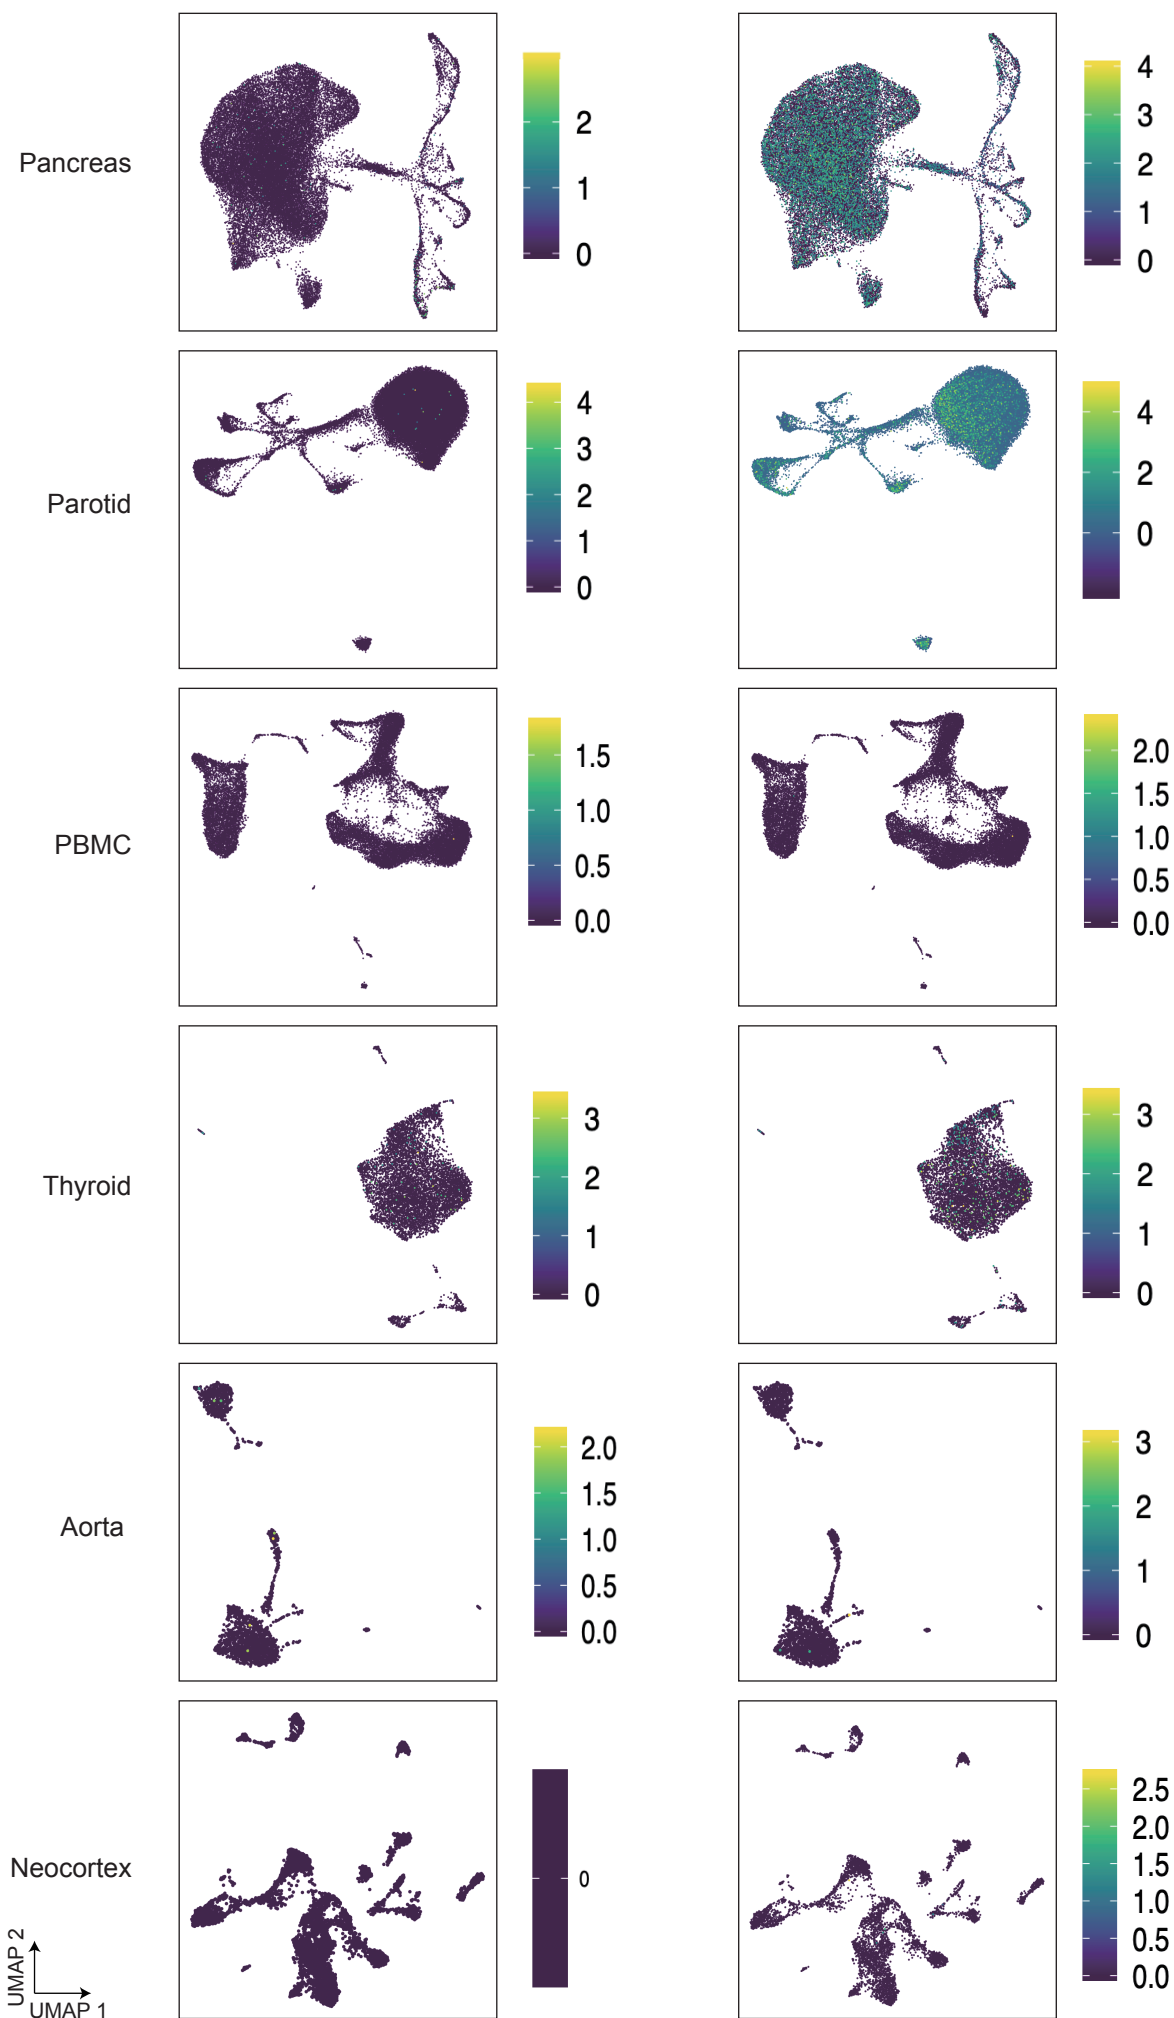

**Supplemental Figure 3**

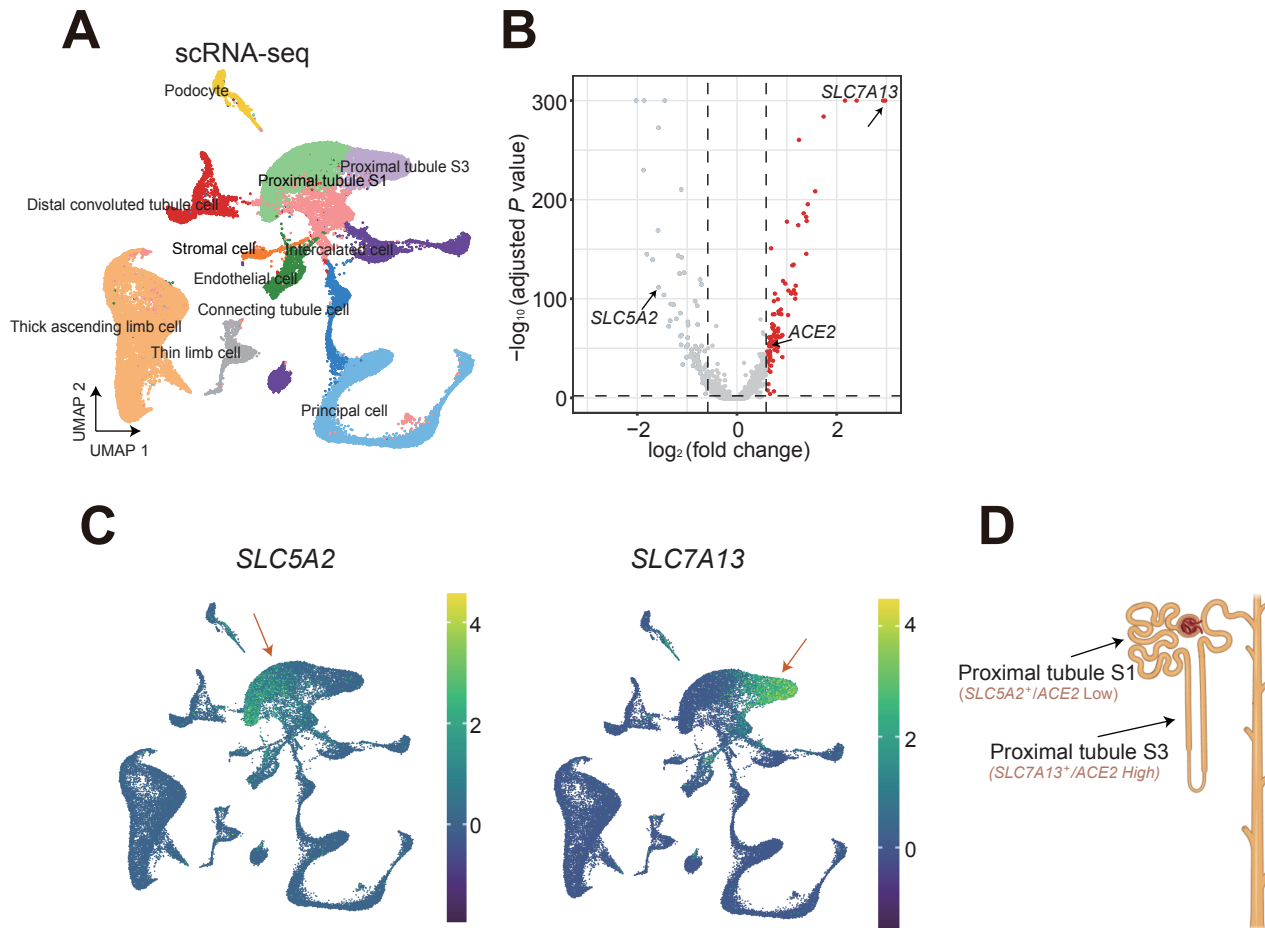



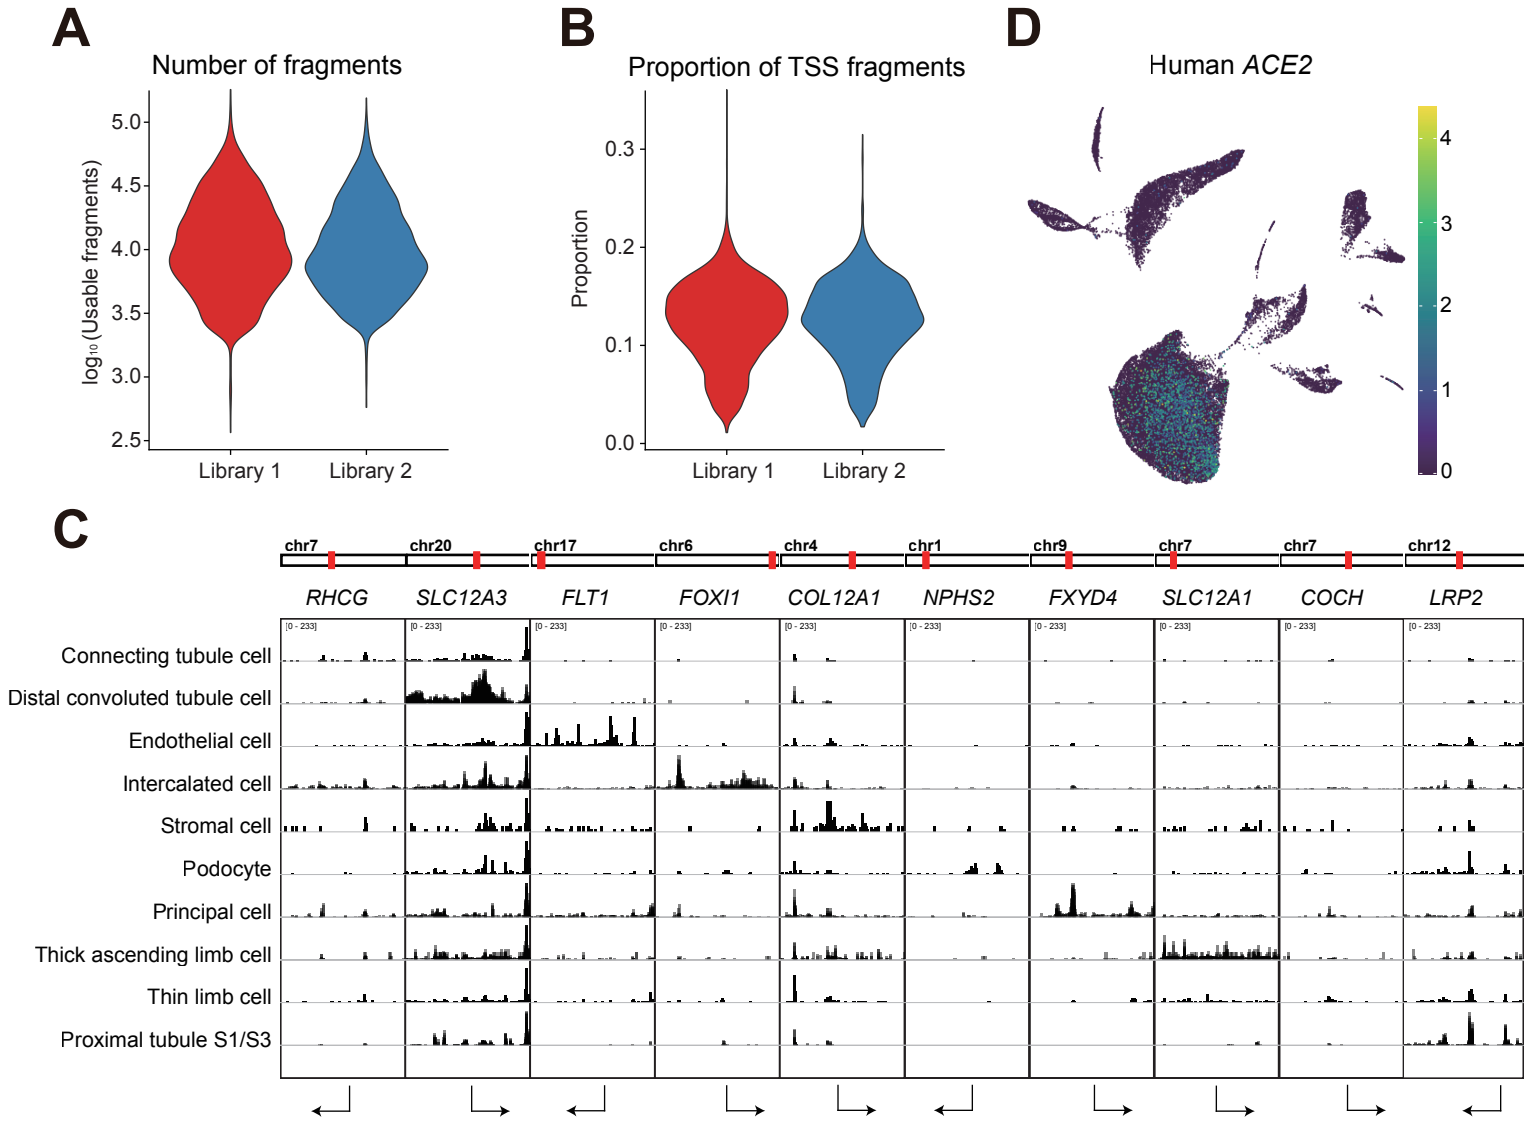

Source: https://www.biorxiv.org/content/10.1101/2020.04.10.022103v1.full.pdf
